1       **Title: Activated regulatory T-cells, dysfunctional and senescent T-**  
2                   **cells dominate the microenvironment of pancreatic cancer**

3

4       **Authors:** Shivan Sivakumar<sup>1,2,3†</sup>, Enas Abu-Shah<sup>2,4†\*</sup>, David J Ahern<sup>2</sup>, Edward H Arbe-  
5 Barnes<sup>5</sup>, Nagina Mangal<sup>6</sup>, Srikanth Reddy<sup>3</sup>, Aniko Rendek<sup>3</sup>, Alistair Easton<sup>1</sup>, Elke  
6 Kurz<sup>2</sup>, Michael Silva<sup>3</sup>, Zahir Soonawalla<sup>3</sup>, Lara R Heij<sup>7,8</sup>, Rachael Bashford- Rogers<sup>9</sup>,  
7 Mark R Middleton<sup>1,3‡</sup>, Michael L Dustin<sup>2‡\*</sup>

8

9       **Affiliations:**

10

11       <sup>1</sup> Department of Oncology, University of Oxford, Oxford OX3 7DQ, UK. <sup>2</sup> Kennedy  
12 Institute of Rheumatology, University of Oxford, Oxford OX3 7FY, UK. <sup>3</sup> Oxford  
13 University Hospitals NHS Foundation Trust, Oxford, UK. <sup>4</sup> Sir William Dunn School  
14 of Pathology, University of Oxford, Oxford OX1 3RE, UK. <sup>5</sup> University of Oxford  
15 Medical School. <sup>6</sup> Nuffield Department of Surgical Sciences, University of Oxford,  
16 Oxford OX3 9DU, UK. <sup>7</sup> Department of General, Gastrointestinal, Hepatobiliary and  
17 Transplant Surgery, RWTH Aachen University Hospital, Aachen Germany. <sup>8</sup> Institute  
18 of Pathology, University Hospital RWTH Aachen, Aachen, Germany. <sup>9</sup> Wellcome  
19 Trust Centre for Human Genomics, University of Oxford, Oxford OX3 7BN, UK.

20

21       † These authors contributed equally to the work.

22       ‡ These authors jointly directed the work.

23       \* correspondence should be addressed to: [enas.abushah@path.ox.ac.uk](mailto:enas.abushah@path.ox.ac.uk), or  
24 [michael.dustin@kennedy.ox.ac.uk](mailto:michael.dustin@kennedy.ox.ac.uk)

25

26

27

1 **Abstract:**

2 Pancreatic cancer has the worst prognosis of any human malignancy and leukocyte  
3 infiltration is a major prognostic marker of the disease. As current immunotherapies  
4 confer negligible survival benefits, there is a need to better characterise leukocytes in  
5 pancreatic cancer to identify better therapeutic strategies.

6 In this study, we analysed 32 human pancreatic cancer patients from two independent  
7 cohorts. A multi-parameter mass-cytometry analysis was performed on 32,000 T-cells  
8 from eight patients. Single-cell RNA sequencing dataset analysis was performed on a  
9 cohort of 24 patients. Multiplex immunohistochemistry imaging and spatial analysis  
10 were performed to map immune infiltration into the tumour microenvironment.

11 Regulatory T-cell populations demonstrated highly immunosuppressive states with  
12 high TIGIT, ICOS and CD39 expression. CD8<sup>+</sup> T-cells were found to be either in  
13 senescence or an exhausted state. The exhausted CD8 T-cells had low PD-1 expression  
14 but high TIGIT and CD39 expression. These findings were corroborated in an  
15 independent pancreatic cancer single-cell RNA dataset from additional 24 patients.

16 These data suggest that T-cells are major players in the suppressive microenvironment  
17 of pancreatic cancer. Our work identifies novel therapeutic targets that should form the  
18 basis for rational design of a new generation of clinical trials in pancreatic ductal  
19 adenocarcinoma.

20

21 **Introduction**

22 Pancreatic ductal adenocarcinoma (PDAC) has the worst outcomes of any  
23 human cancer with a 5-year survival around 7% (1). Early diagnosis with surgical  
24 resection followed by combination chemotherapy offers the best chance of long-term  
25 survival (2). We and others have shown that the immune infiltrate in the primary  
26 pancreatic tumour is prognostic of the clinical course after a surgical resection (3, 4).  
27 Pancreatic cancer has a complex immune microenvironment with T-cells,  
28 macrophages, neutrophils, NK cells, B-cells and dendritic cells present (5-9).  
29 Checkpoint blockade immunotherapies, especially antibodies to PD-1 and PD-L1,  
30 reactivate tumour-specific T-cells and have demonstrably improved the prognosis of  
31 melanoma and lung cancer (10, 11). However, these immunotherapies have had  
32 minimal effects on outcomes in pancreatic cancer, with no durable responses in patients  
33 (12-15).

1           Due to the poor response of checkpoint blockade agents in PDAC, we propose  
2 taking a step back and characterise the states and specific populations of T-cells in this  
3 disease, which is the focus of this paper. Although it has been shown that CD4<sup>+</sup>, CD8<sup>+</sup>  
4 and regulatory T-cells (Tregs) infiltrate the microenvironment of PDAC, little is known  
5 about their phenotype, differentiation or activation status (16, 17). Furthermore,  
6 although cancer therapeutics has been dominated by PD-1 and CTLA-4 targeting  
7 antibodies, many other checkpoints with the potential to impinge on the clinical course  
8 of PDAC, including TIGIT, Tim3, Lag3 and CD39, have been identified. Co-  
9 stimulatory molecules; which promote suppressive function of CD4<sup>+</sup> regulatory T cells  
10 and CD8<sup>+</sup> suppressor cells, such as ICOS, OX40, CD40L, GITR and 4-1BB may also  
11 bear upon outcomes (18, 19).

12           In this study we characterised the immune landscape in primary tumours and  
13 the periphery of patients with pancreatic cancer, focusing on T-cells' functional states,  
14 and their immune checkpoint expression patterns.

15

## 16 **Results**

17 *Heterogenous and suppressive innate immune cell composition within pancreatic*  
18 *cancer*

19           Using fresh samples from tumour resections (Table 1) and matched blood  
20 samples, we identified the main cellular components and immune lineages with a panel  
21 of mass-cytometry (CyTOF) antibodies (Fig. 1a, Table 2). The epithelial cell content  
22 of samples was 25.81±6.92% (median±sd) and that of the stroma 50.06±14.66%  
23 (Fig.1b), in agreement with the highly fibrotic nature of PDAC (20). All 8 patients  
24 exhibited a significant level of immune cell involvement, with CD45<sup>+</sup> being  
25 22.85±12.60% of all live cells (Figure 1- figure supplement 1).

26           We identified the main immune cell lineages illustrated in the viSNE plot and  
27 marker expression maps (Fig. 1c). We further characterised different metaclusters of  
28 cells corresponding to different lineages using unsupervised hierarchical clustering  
29 (Fig. 1d; coloured viSNE and heatmap). There were multiple shared features across all  
30 patients including the presence of CD4<sup>+</sup> T-cells (metacluster 11), CD8<sup>+</sup> T-cells  
31 (metacluster 7), granulocytes (metaclusters 8,10) and mononuclear phagocytes  
32 (metaclusters 1,2) and myeloid-derived suppressor cells (MDSCs; metaclusters 4,5).  
33 Interestingly, both B-cells (metacluster 3) and NK cells (metacluster 9) numbers were  
34 negligible (<0.5%) in some patients' tumours (Fig. 1d, inset). For example, the tumour

1 in patient 3 was deficient in B-cells and that in patient 8 deficient in NK cells (Fig.  
2 S2b).

3 We identified multiple subsets of NK cells (Fig. 1e, Figure 1- figure supplement  
4 3), granulocytes (Fig. 1f, Figure 1- figure supplement 3) and mononuclear phagocytes  
5 (Fig. 1g, Figure 1- figure supplement 4). Strikingly, most NK metaclusters expressed  
6 the inhibitory molecule TIGIT, with those having the highest expression being  
7 granzyme B (GzmB) negative, indicative of defective cytotoxicity (e.g metacluster 7).  
8 These cells also exhibited tissue residency features, such as expression of the adhesion  
9 molecule CD103. Conversely, the infiltrating NK populations had features of  
10 cytotoxicity with CD16, CD57 and GzmB expression (metaclusters 4,6).  
11 The majority of the granulocytes were CD15<sup>+</sup>CD16<sup>+</sup>CD14<sup>±</sup>, corresponding with  
12 granulocyte-MDSCs (G-MDSC) (21, 22) or antigen-presenting tumour associated  
13 neutrophils (23), marked by their HLA-DR expression (metacluster 4), although we  
14 also observed the co-expression of PD-L1.

15 In the myeloid compartment, we identified MDSCs expressing low levels of  
16 HLA-DR and high PD-L1 (metaclusters 3), and G-MDSC (metacluster 6). The majority  
17 of myeloid cells had an intact antigen presentation capability marked by high levels of  
18 HLA-DR (metaclusters 2,4,5). This is in contrast to previous reports describing the  
19 major myeloid infiltration in PDAC to be MDSCs (21, 24).

20 Peripheral blood from the same patients presented different population  
21 compositions (Figure 1- figure supplement 5). Specifically, we observed a small  
22 percentage (1.26±1.37%) of low-density neutrophils in the PBMC samples (Figure 1-  
23 figure supplement 5a, metacluster 11,14) which have been described in PBMCs of  
24 patients with tumours (25). Circulating NK cells, unlike the tumour-associated NK  
25 cells, appeared to retain their cytolytic activity with most sub-populations expressing  
26 CD56<sup>dim</sup>, CD57, GzmB and CD16 (Figure 1- figure supplement 5b). We also observed  
27 a significant population of circulating MDSCs (Figure 1- figure supplement 5a,  
28 metacluster 3, 27.82±8.09%) and the presence of T-cell/monocyte conjugates (Figure  
29 1- figure supplement 5a, metaclusters 2 and 13, 0.85±0.42%) expressing PD-L1 (Figure  
30 1- figure supplement 5c, metacluster 1) suggestive of an immune perturbation (26)  
31 (Figure 1- figure supplement 5c, metacluster 1).

32

33 *Suppressive and non-tumour responsive T-cells predominate PDAC microenvironment*

1 We hypothesised that the lack of activity of established checkpoint inhibitors  
2 such as anti CTLA-4 and anti PD-1 indicates they are not prominent pathways in  
3 PDAC. To test this hypothesis, we re-evaluated T-cells' states in the tumour  
4 microenvironment. We analysed the CD3<sup>+</sup> T-cells functional states from PDAC  
5 tumours using differentiation, activation and checkpoint markers, to characterise the  
6 CD8<sup>+</sup> (Fig. 2a, Figure 2- figure supplement 1), CD4<sup>+</sup> (Fig. 2b, Figure 2- figure  
7 supplement 2) and Treg (Fig. 2c, Figure 2- figure supplement 3) compartments.

8 We identified 30 distinct metaclusters of CD8<sup>+</sup> T-cells. Multiple metaclusters  
9 displayed characteristics of a senescent population, CD57<sup>+</sup>CD27<sup>-</sup>CD28<sup>-</sup> (metaclusters  
10 5,11; 3.89±3.66% of CD8<sup>+</sup> T cells) or terminally differentiated CD45RA<sup>+</sup>CD27<sup>-</sup>  
11 /lowCD28<sup>-/low</sup> (metaclusters 2,7,8; 40.57±18.06%). These cells have been previously  
12 described in the context of aging and viral infections and are associated with  
13 proliferative senescence and reduced T-cell signalling, whilst maintaining their  
14 cytolytic capabilities (27-29). More recently, these have been observed in the context  
15 of cancer (30, 31), however, this is the first report to describe them in pancreatic cancer.  
16 Two suppressive populations with negative immune modulatory effects were  
17 identified: (i) a metacluster of FoxP3<sup>+</sup> CD8<sup>+</sup> “regulatory” T-cells (metacluster 12),  
18 which was only present in 2 out of the 8 patients (Figure 2- figure supplement 1), and  
19 (ii) an exhausted population expressing high levels of multiple inhibitory receptors  
20 (metacluster 6; 4.81±8.73%). Interestingly, the exhausted metaclusters exhibited  
21 intermediate-low PD-1 expression, which may explain the limited clinical success  
22 targeting the PD1-PDL1 axis. We also identified metaclusters with markers of  
23 activation (metaclusters 10,13), proliferation and cytotoxicity (metacluster 9). Overall,  
24 we determined that ~ 11.63±8.32% (mean±s.d) of the CD8<sup>+</sup> T-cells comprise  
25 expression profiles potentiating anti-tumour responses while the majority are either  
26 unresponsive (naïve, senescent or exhausted) or even inhibitory. This suggests a certain  
27 degree of anti-tumour potential of the CD8<sup>+</sup> compartment that could be inhibited by  
28 other factors preventing the control of the disease.

29 We next analysed the contribution from CD4<sup>+</sup> T-cells as potential mediators to  
30 support CD8<sup>+</sup> T-cells (Fig. 2b, Figure 2- figure supplement 2). The 10 identified  
31 metaclusters were divided into three main groups: (i) senescent and terminally  
32 differentiated (metaclusters 6,8,4) or non-tumour responsive (metaclusters 2,5,9,10)  
33 (~76.15±9.45%), (ii) exhausted (metacluster 7; 2.71±2.03%) and (iii) Foxp3<sup>+</sup>

1 regulatory ( $\sim 18.53 \pm 8.78\%$ ). Indeed, the regulatory CD4<sup>+</sup> cells comprised between 8.30  
2 and 32.50% of the CD4<sup>+</sup> population across patients.

3 We hypothesised that the Treg population could contribute to inhibiting CD8<sup>+</sup>  
4 T-cell responses. We characterised the precise Treg states within the tumour  
5 microenvironment (Fig. 2c, Figure 2- figure supplement 3). The majority of the Tregs  
6 ( $\sim 54.47 \pm 19.15\%$ ) showed evidence of functional activation and high suppression  
7 capacity. They expressed the TNF superfamily receptor 4-1BB, HLA-DR and the  
8 inhibitory receptors PD-1 and TIGIT. Some metaclusters showed evidence of cytotoxic  
9 activity (CD57<sup>+</sup>, metacluster 2) while the most frequent metaclusters had high  
10 expression of TIGIT, ICOS and CD39, indicative of potent inhibitory function (32-36).

11 The peripheral blood CD8<sup>+</sup> and CD4<sup>+</sup> T-cells also exhibited a population of  
12 senescent T cells (Figure 2- figure supplement 4a, metacluster 4,  $26.02 \pm 18.62\%$  of  
13 CD8<sup>+</sup>, Figure 2- figure supplement 4b, metacluster 1,  $5.21 \pm 10.56\%$  of CD4<sup>+</sup>), which  
14 might reflect the age of our cohort (median 71 years). Both populations had functionally  
15 active subsets; in CD8<sup>+</sup> an activated and proliferating metacluster was identified (4-  
16 1BB<sup>+</sup>HLADR<sup>+</sup>, metaclusters 7,8,  $1.12 \pm 0.70\%$ ). However, there were no exhausted  
17 TIGIT<sup>+</sup> CD8<sup>+</sup> T-cells in the periphery (Figure 2- figure supplement 5a). There was also  
18 a population of cytotoxic CD4<sup>+</sup> T-cells (GzmB<sup>+</sup>, metaclusters 2,7,  $2.61 \pm 4.05\%$ ). T-  
19 cell/monocyte conjugates, were only observed with CD4<sup>+</sup> but not CD8<sup>+</sup> T-cells  
20 (CD3<sup>+</sup>CD4<sup>+</sup>CD14<sup>+</sup>, Figure 2- figure supplement 4b, metacluster 11). Finally, the Tregs  
21 in the periphery comprised  $9.59 \pm 4.30\%$  of the CD4<sup>+</sup> T-cells, were characterised by  
22 high levels of TIGIT expression albeit at lower levels compared to their tumour-  
23 associated counterparts ( $\sim 30\%$  higher median expression, Figure 2- figure supplement  
24 5b). Not surprisingly, there was a larger naïve population (CCR7<sup>+</sup>CD45RA<sup>+</sup>) compared  
25 to the tumour,  $13.2 \pm 5.47\%$  vs  $6.56 \pm 3.75\%$ .

26

27 *Single-cell RNA sequencing validates senescence and regulatory signatures in tumour*  
28 *infiltrating T-cells*

29 The CyTOF analysis highlighted senescent T-cells and TIGIT<sup>+</sup>ICOS<sup>+</sup> Tregs as  
30 potentially important immune cells in pancreatic cancer. We hypothesised similar  
31 signatures should be identified on the transcriptional level. We have re-analysed a  
32 publicly available single-cell RNA sequencing dataset of 24 PDAC patients from Peng  
33 et al (37) (Fig. 3). Focusing on the T-cell compartment, we identified 250 unique

1 clusters as shown in the UMAP (Figure 2- figure supplement 5c, Fig. 3a) corresponding  
2 to CD8<sup>+</sup> and CD4<sup>+</sup> T-cells as well as non-conventional T-cells.

3 Among those clusters we identified 13 Treg clusters based on *FOXP3*  
4 expression, all of which exhibit high expression levels of *TIGIT* and co-expressing  
5 *ICOS* and *ENTPD-1* (CD39) (Fig. 3b, violin plots, supplemental data 1). We also  
6 identified 6 clusters of senescent T-cells (Fig. 3c) characterised by increased NK marker  
7 expression (*KLRG1*, *KLRB1*) and senescent markers (*HCST*, *HMGB1*) (28). Complete  
8 differential expression analysis of those populations relative to other CD4<sup>+</sup> and CD8<sup>+</sup>  
9 T-cells is provided in supplemental data 2.

10 Finally, we also identified exhausted cells characterised by the co-expression of  
11 at least 3 of the known exhaustion signature genes *PDCD1*, *HAVCR2* (Tim-3), *LAG3*,  
12 *TIGIT*, *CTLA4* and *ENTPD-1*, (Fig. 3d). This has captured exhausted clusters with low  
13 *PDCD1* expression (Fig. 3d violin plot clusters 35, 85, 96, 161). Interestingly,  
14 previously reported exhaustion genes such as *TOX* (38), *LAYN* and *MIR155HC* (39),  
15 were only upregulated in a subset of the exhausted cell clusters. Together, this suggests  
16 a unique exhaustion signature in PDAC-associated T cells.

17 In summary, we were able to corroborate our observations from the mass  
18 cytometry analysis in an independent cohort of PDAC patients at the transcriptomic  
19 level. The relative abundance of the T-cell populations identified was similar across the  
20 two cohorts (Figure 2- figure supplement 5d).

21

22 *Effector T-cells are uniformly distributed within pancreatic tumour and Tregs are*  
23 *restricted to the stroma*

24 To investigate the potential cell-cell communication between different T-cell  
25 subsets and the surrounding malignant epithelium of the tumour, we analysed cellular  
26 spatial distribution using multiplex immunofluorescence (IF) on formalin-fixed  
27 paraffin-embedded (FFPE) sections from the same patients as analysed by CyTOF (Fig.  
28 4). For each case we identified cancerous, inflamed (pancreatitis) and normal tissue  
29 regions, where available (Fig. 4a-c respectively) and annotated the sub-regions into  
30 epithelium (based on pan-Cytokeratin staining) and stroma (based on  $\alpha$ SMA staining).  
31 Using the expression of the canonical T-cell markers (CD3<sup>+</sup>, CD4<sup>+</sup>, CD8<sup>+</sup> and Foxp3<sup>+</sup>),  
32 we identified their respective cellular subsets (Figure 4- figure supplement 1). The  
33 CD4<sup>+</sup> and CD8<sup>+</sup> distribution within the different regions of the tissue (Fig. 4d) was

1 homogeneous with no signs of exclusion from the tumour parenchyma or different  
2 stroma regions (Figure 4- figure supplement 1b). Conversely, Tregs were exclusively  
3 restricted to the stroma in the cancer and inflamed tissue and almost absent from the  
4 epithelium regions. Explaining some recent reports linking Treg depletion to fibroblast  
5 pathology in PDAC (40, 41). To further elucidate the relationships between the cells  
6 we performed proximity analysis (See methods for details) that revealed the majority  
7 of CD8<sup>+</sup> T-cells to be within 50  $\mu$ m of the epithelium, with a trend of lower numbers  
8 within the cancer region compared to normal albeit not statistically significant (Fig. 4e,  
9  $p=0.1167$ ). 90% of Tregs were in close proximity of a CD8<sup>+</sup> T-cell, potentially  
10 facilitating their immunosuppressive activity across all assessed regions (Fig. 4f).

11

## 12 **Discussion**

13 Here we report one of the first comprehensive characterisation of T-cells in  
14 primary human pancreatic ductal adenocarcinoma, revealing multiple distinct immune  
15 cell signatures of this tumour with potential for informing therapeutic approaches.  
16 Previous reports implied the presence of an immunosuppressive tumour  
17 microenvironment, but they lacked a clear definition of its components (15, 42). Here  
18 we identify the different immune cells contributing to this phenotype which include  
19 granulocytes and myeloid MDSCs (Figure 1), dysfunctional NK cells and T-cells, and  
20 regulatory T-cells (Figure 2).

21 We identified clear signatures of dysfunctional effector T-cell populations  
22 which are present in both the CD8<sup>+</sup> and CD4<sup>+</sup> compartments. The first is an exhausted  
23 signature, which surprisingly, is not characterised by the traditional high PD-1  
24 expression, nor does the microenvironment show high expression of its ligand PD-L1  
25 (Fig. S10e). However, exhausted cells express a different set of inhibitory molecules  
26 including TIGIT (43) and CD39 (Figure 2a, Figure 3c). This finding has a direct  
27 implication to designing immune-checkpoint trials where we suspect anti PD-1  
28 combinations might have limited, if any, advantage.

29 Tregs have been shown to be present in the PDAC microenvironment (5), but  
30 their functional characteristics are poorly understood. We identified different subtypes  
31 of Tregs associated with PDAC, including a highly suppressive Treg population  
32 expressing the inhibitory molecule TIGIT and co-stimulatory molecule ICOS (Figure  
33 2c, Figure 3b) whose substantial suppression capacity has been demonstrated by



1 multiple groups (32, 34, 44). There are currently multiple antibodies in development  
2 targeting the checkpoint molecules we observed on dysfunctional CD8<sup>+</sup> T-cells and  
3 Tregs and our data calls for trialling them in PDAC. Specifically, anti-TIGIT has been  
4 recently proposed as an alternative immunotherapy to anti PD-1 in colorectal, lung and  
5 pancreatic cancers (45). From our data we can envision it having an effect not only on  
6 dysfunctional CD8<sup>+</sup> T-cells but also on NK cells and Tregs.

7 The spatial analysis of cell distribution in the tumour has revealed a unique  
8 localisation of Tregs to the stroma (Figure 4d). These observations, in light of a recent  
9 study in a murine model of PDAC that showed depletion of Tregs to result in disease  
10 worsening through an increase in pathogenic fibroblasts (46), highlight the need to  
11 understand the details of Treg/fibroblast interactions and its role in disease progression.  
12 A possible strategy proposed from this work would be to block exclusively the activity  
13 of the ICOS<sup>+</sup>TIGIT<sup>+</sup> Tregs population while forgoing any depletion approaches that  
14 might result in severe adverse effects.

15 Finally, we identified a novel senescence signature, which unlike the exhausted  
16 phenotype cannot benefit from checkpoint blockade approaches. T-cell senescence has  
17 been discussed in the context of viral infections, aging and CAR T-cell therapies and  
18 different avenues to replace or rejuvenate those cells through metabolic manipulations,  
19 cell therapy and engineering are being investigated (47-49). It would be interesting to  
20 understand the mechanism of the observed senescence and whether it is directly linked  
21 to the immunosuppressive activity of Tregs in the tumour microenvironment (50, 51)  
22 or related to aging in those patients. If the former, we anticipate that lifting Treg  
23 suppression will reverse the phenotype while the latter would require interventions to  
24 rejuvenate the cells to increase the chances to elicit anti-tumour responses.

25 We described features shared between the tumour and the peripheral blood  
26 (Figure 1- figure supplement 5, Figure 2- figure supplement 2), especially the  
27 circulating TIGIT<sup>+</sup>ICOS<sup>+</sup> Tregs. Those observations made in patients with localised  
28 disease raise the possibility of early detection strategies that warrant investigation in  
29 larger cohorts.

30 In summary, our data maps the T-cell landscape of pancreatic cancer and we  
31 propose multiple novel therapeutic approaches to employ immunotherapies in this  
32 recalcitrant disease as well as further scientific investigation. Current pancreatic cancer  
33 mouse models appear to lack the immune features we observe using human patient

1 samples (52) highlighting the need to directly test the hypotheses generated from this  
2 study and its implication through the design of novel clinical trials.

3

#### 4 **Materials and Methods**

5

##### 6 *Patient recruitment*

7 Samples were collected from 8 patients diagnosed with pancreatic adenocarcinoma  
8 (Table 1) that were fit for palliative operation. The 8 patients consisted of 5 males and  
9 3 females and ranged from ages of 51 to 80. 7 out of 8 patients has adjuvant  
10 chemotherapy following the operation, patient 2 and 3 have died within 9 months of  
11 the operation while patients 4, 6 and 7 have recurred since. All patients were consented  
12 for this study via the Oxford Radcliffe biobank (09/H0606/5+5, project: 18/A031).

13

##### 14 *Sample Collection*

15 From the patients described above, 20 ml blood was collected immediately before  
16 surgery into sodium heparin tubes (BD). Tissue samples were placed in RPMI media  
17 (Corning) on ice and were reviewed by a designated histopathologist who provided a  
18 10mm by 10mm by 3mm piece for this study. Samples were digested, stained and run  
19 on CyTOF.

20

##### 21 *PBMC Isolation*

22 Blood samples were processed within 4 h of collection. 20 ml of 2% FBS/PBS was  
23 added to 20 ml of whole blood. This was layered onto Ficoll-Paque. Sample was  
24 centrifuged at 1300 x g for 20 min at the slowest acceleration and with break off. After  
25 centrifugation, the PBMC ring was removed using a pipette. The ring was topped up  
26 with 2% FBS/PBS and centrifuged again at 300 x g. Any excess red blood cells were  
27 lysed with ACK solution (Life Technologies, A1049201) and cells were washed again.

28

##### 29 *Tissue Digestion*

30 Sample was initially mechanically disrupted using a scalpel into small pieces. The  
31 pieces were put into a 15 ml conical tube, with 9 ml of complete RMPI (10% FBS, 1%  
32 Pen/Strep and 1 mM Glutamine) and 1 ml of 10X hyaluronidase/collagenase solution  
33 (StemCell, 07912). A first round of digestion was done at 37 °C for 30 min in a pre-

1 warmed shaker. The supernatant was collected without disrupting the tissue and a fresh  
2 digestion media was added (10 ml complete RPMI containing 200 U of collagenase IV  
3 (Lorne Laboratories, LS004194), 100 µl/ml of DNAaseI (Sigma, DN25) and 0.5 U of  
4 universal nuclease (Pierce, 88702) for an additional 30 min of digestion as before. The  
5 supernatant was combined with the one from the first digestion step and the remaining  
6 tumour pieces were squeezed through a 100 µm tissue strainer with a further 10 ml of  
7 complete RPMI. The supernatants from all digestion steps were combined and  
8 centrifuged for 10 min at 300 x g. Any residual red blood cells were removed with ACK  
9 solution.

10

### 11 *CyTOF sample preparation*

12 Samples were directly taken following isolation for CyTOF staining. Preconjugated  
13 antibodies were obtained from Fluidigm or purified antibodies from Biolegend were  
14 conjugated in house using Maxpar Conjugation kits (Fluidigm). CD14-Qdot655 was  
15 purchased from Thermofisher and acquired in the 114Cd channel - See table 2 for  
16 detailed list of antibodies and clones. Cells were incubated with Intercalator-<sup>103</sup>Rh  
17 (Fluidigm, 201103A) for dead cell exclusion, for 10 min at room temperature, followed  
18 by staining for surface markers for 20 min at room temperature. Cell fixation and  
19 permeabilization was performed using the Foxp3+/Transcription factor staining set  
20 (eBioscience, 00-5523-00). The nuclear staining protocol was used for the simultaneous  
21 detection of cytoplasmic and nuclear targets (Ki67, CTLA-4, granzyme B and Foxp3),  
22 staining was done for 20 min at room temperature. An additional fixation step with  
23 1.6% paraformaldehyde diluted in PBS for 10 min at room temperature. The cells were  
24 washed and incubated with 0.125 nM Intercalator-191Ir (Fluidigm, 201192A) diluted  
25 in Maxpar fix and perm buffer overnight at 4 °C until acquisition.

26

### 27 *CyTOF Data Acquisition*

28 Immediately prior to acquisition, samples were washed twice with Maxpar cell staining  
29 buffer (Fluidigm), twice with cell acquisition solution (Fluidigm) and then resuspended  
30 at a concentration of 0.5 million cells/ml in cell acquisition solution containing a 1/10  
31 dilution of EQ 4 Element Beads (Fluidigm, 201078). The samples were acquired on a  
32 CyTOF Helios mass cytometer at an event rate of <300 events/second. After  
33 acquisition, the data were normalized using bead-based normalization in the CyTOF

1 software. Data were exported as FCS files for downstream analysis. The data were  
2 gated to exclude residual normalization beads, debris, dead cells and doublets, leaving  
3 DNA<sup>+</sup> Rh<sup>low</sup> events for subsequent clustering and high dimensional analyses.

4

#### 5 *CyTOF Data Analysis:*

6 Dimensionality reduction visualisation with viSNE and clustering with FlowSOM were  
7 done using built in functions in cytobank (<https://www.cytobank.org>). The number of  
8 clusters and metaclusters for the FlowSOM algorithm were reviewed by the  
9 researchers. Data was initially overclustered to identify small populations (all data  
10 shown in supplementary figures), but for clarity metaclusters were manually combined  
11 following researchers' evaluation and presented in main figures. Heatmaps of  
12 normalized marker expression, relative marker expression, and relative difference of  
13 population frequency were generated by cytobank and plotted using Prism (GraphPad).  
14 Dendograms showing hierarchical clustering of the heatmaps was performed using  
15 Morpheus from the Broad Institute  
16 (<https://www.broadinstitute.org/cancer/software/morpheus/>), as an average with 1-  
17 Pearson correlation as a parameter.

18

#### 19 *Collection of Histological Sections*

20 Sections were cut on a Leica RM2235 at around 5 microns thickness, floated on a warm  
21 water bath, dissected using forceps to isolate the region of interest and lifted centrally  
22 onto TOMO slides (VWR, TOMO® 631-1128). Sections were air-dried. Samples were  
23 sequentially labelled with CD4, CD8, Foxp3, Pan Cytokeratin, and  $\alpha$ SMA.

24

#### 25 *Multiplex immunohistochemistry*

26 Multiplex (MP) immunofluorescence (IF) staining was carried out on 4um thick  
27 formalin fixed paraffin embedded (FFPE) sections using the OPAL™ protocol  
28 (AKOYA Biosciences) on the Leica BOND RXm autostainer (Leica, Microsystems).  
29 Six consecutive staining cycles were performed using the following 1ry Antibody-Opal  
30 fluorophore pairings: CD4 (clone 4B12, NCL-L-CD4-368 (Leica Novocastra) – Opal  
31 520); CD8 (clone C8/144B, M7103 (DAKO Agilent) -Opal 570); CD3 (clone LN10,  
32 NCL-L-CD3-565 (Leica Novocastra) – Opal 540); FOXP3 (clone 236A/E7, ab20034

1 (Abcam) – Opal 620); Pan Cytokeratin (clone AE1/AE3, M3515 (DAKO Agilent) –  
2 Opal 650) and  $\alpha$ SMA (rabbit polyclonal, ab5694 (Abcam) -Opal 690).

3 Primary (1ry) Antibodies were incubated for one hour and detected using the BOND™  
4 Polymer Refine Detection System (DS9800, Leica Biosystems) as per manufacturer’s  
5 instructions, substituting the DAB for the Opal fluorophores, with a 10 min incubation  
6 time and without the Haematoxylin step. Antigen retrieval at 100 °C for 20 min, as per  
7 standard Leica protocol, with Epitope Retrieval (ER) Solution 2 (AR9640, Leica  
8 Biosystems) was performed before each 1ry antibody was applied. Slides were then  
9 mounted with VECTASHIELD® Vibrance™ Antifade Mounting Medium with DAPI  
10 (H-1800-10, Vector Laboratories. Whole slide scans and multispectral images (MSI)  
11 were obtained on the AKOYA Biosciences Vectra® Polaris™. Batch analysis of the  
12 MSIs from each case was performed with the inForm 2.4.8 software provided. Finally,  
13 batched analysed MSIs were fused in HALO (Indica Labs), to produce a spectrally  
14 unmixed reconstructed whole tissue image, ready for analysis.

15 Cover slips were lifted post multiplex staining and CD68 (Clone PG-M1, Dako M0876)  
16 antibody was stained for chromogenically on the Leica BOND autostainer. Antigen  
17 retrieval at 100 °C for 20 min with Epitope Retrieval Solution 2 (AR9640, Leica  
18 Biosystems); primary antibody incubation at 1/400 dilution for 30 min then detection  
19 using the BOND™ Polymer Refine Detection System (DS9800, Leica Biosystems) as  
20 per manufacturer’s instructions.

21

### 22 *Multiplex immunohistochemistry- Image Analysis*

23 Scanned slides were analysed using Indica Labs HALO® (version 3.0.311.407) image  
24 analysis software. Multiplex and brightfield images were manually annotated by a  
25 pathologist, defining areas of pancreas, pancreatitis, pancreatic adenocarcinoma and  
26 lymph node. The pathologist taught an integrated Random Forrest Classifier module  
27 to segment the multiplex images into stroma and epithelium, with obvious areas  
28 artefactual staining manually excluded. A separate Random Forest Classifier algorithm  
29 was taught to segment tissue into areas of high, medium and low smooth muscle actin  
30 ( $\alpha$ SMA) expression. Analysis and cell detection/phenotyping was done using Indica  
31 Labs - HighPlex FL v3.1.0 (fluorescent images) and Indica Labs – Multiplex IHC  
32 v2.1.1 (brightfield images). Cells were annotated based on their marker expression as  
33 follows: Epithelium (DAPI+ Cytokeratin+), CD4 helper (DAPI+CD4+), CD8 cytotoxic

1 (DAPI+CD8+) and regulatory T-cell (DAPI+CD4+Foxp3+). Multiplex and brightfield  
2 images were registered and topological analysis was carried out using integrated  
3 proximity analysis modules. Proximity analysis was done using a 50  $\mu\text{m}$  with 20 bands  
4 cut-off as this allowed us to capture physically interacting cells (within  $\sim 20 \mu\text{m}$  radius)  
5 as well as account for cells that could contribute to soluble effector molecule gradients.  
6 Statistical analysis was done using 2-way ANOVA in Prism (GraphPad).

7

8 *Single-cell RNA sequencing analysis: Pre-processing, integration and batch correction*  
9 FastQ files for 24 PDAC and 11 normal samples were downloaded from the Genome  
10 Sequence Archive (<https://bigd.big.ac.cn/search?dbId=gsa&q=CRA001160>), count  
11 matrices were generated in Cell Ranger 3.1.0 as per the original paper (37). Raw count  
12 matrices were imported into the Seurat R package and merged (53). Cells with <200  
13 and  $>2.5 \times 10^{10}$  genes, <400 and  $> 1 \times 10^{16}$  molecules, and >25% mitochondrial genes  
14 were excluded. Batch correction was performed in Harmony (54).

15

16 *Single-cell RNA sequencing analysis: Single cell clustering and annotation*

17 Uniform manifold approximation and projection (UMAP) was performed on the  
18 scRNAseq harmonised cell embeddings, upon which clustering was performed. 12  
19 broad cell clusters were identified using reference pancreas and immune gene lists  
20 (supplemental data 3). The T-cell cluster was subsetted into a new Seurat object, and  
21 UMAP was re-performed using genes relevant to T-cells to generate 250 clusters  
22 (supplemental table 4).

23 Mean and 75<sup>th</sup> percentile normalised count matrices were generated for these clusters.  
24 75<sup>th</sup> percentile normalised counts were used for cluster identification for all genes  
25 except for *CD4* and *B3GATI* (where, due to low gene capture (55) in all clusters, means  
26 were used). Clusters without expression of any of *CD3D*, *CD3E*, *CD3G* were excluded  
27 to ensure only T-cells were analysed. Double negative clusters were defined by negative  
28 75<sup>th</sup> percentile expression of *CD8A* and *CD8B*, and negative mean expression of *CD4*.  
29 Double positive clusters were defined by positive expression of these genes. The  $\text{CD4}^+$   
30 T-cells were defined as the remaining clusters with positive mean expression of *CD4*.  
31 The  $\text{CD8}^+$  T-cells were defined as the remaining clusters which co-express *CD8A* and  
32 *CD8B*. The following filters were used for cluster definitions of validated cell  
33 populations: Tregs (positive expression of *FOXP3*); Senescent (negative expression of

1 *CD27* and *CD28*, positive 75<sup>th</sup> percentile expression of *KLRG1* and positive mean  
2 expression of *B3GATI*); Exhausted (positive 75<sup>th</sup> quantile expression of  $\geq 4$  of  
3 *HAVCR2*, *PDCD1*, *TOX*, *LAG3*, *CTLA4*, *TIGIT*, *CD38*, *ENTPD-1* and positive  
4 expression of TRDC was filtered out to exclude gamma-delta T-cells).

5

6 *Single-cell RNA sequencing analysis: Data analysis and figures*

7 Differential expression analysis was performed with the FindMarkers function in  
8 Seurat. Scaled expression was extracted from Seurat tumour samples only and truncated  
9 violins were plotted with Prism (GraphPad). Normalised expression heatmaps were  
10 plotted in Prism (GraphPad) using matrices of 75<sup>th</sup> percentile and mean expression.

11

## 12 **Supplementary Materials**

13

14 Figure 1- figure supplement 1: Individual patients' immune populations.

15 Figure 1- figure supplement 2: Individual patients' NK populations.

16 Figure 1- figure supplement 3: Individual patients' Granulocyte populations.

17 Figure 1- figure supplement 4: Individual patients' Mononuclear Phagocytes  
18 populations.

19 Figure 1- figure supplement 5: Immune-complexes and MDSC observed in peripheral  
20 blood of PDAC patients.

21 Figure 2- figure supplement 1: Individual patients' CD8<sup>+</sup> T-cells populations.

22 Figure 2- figure supplement 2: Individual patients' CD4<sup>+</sup> T-cells populations.

23 Figure 2- figure supplement 3: Individual patients' Treg populations.

24 Figure 2- figure supplement 4: Similar T-cell signatures of senescence and suppression  
25 to tumours are observed in peripheral blood.

26 Figure 2- figure supplement 5: Expression profiles of TIGIT in blood and tumour and  
27 cell frequency validation with scRNA seq.

28 Figure 3- figure supplement 1: Multiplex cell annotation scheme.

29 Table S1. Patient Data

30 Table S2. CyTOF Panel

31 Data File 1: Top differentially expressed genes by 75<sup>th</sup> percentile and means for  
32 Exhausted, Senescent and T-reg metaclusters.

33 Data File 2: Differential expression analysis for Exhausted, Senescent and T-reg  
34 metaclusters.

1 Data File 3: Reference pancreas and immune gene lists

2 Data File 4: T-cell complete gene list

3

#### 4 **References**

- 5 1. T. Kamisawa, L. D. Wood, T. Itoi, K. Takaori, Pancreatic cancer. *The Lancet*  
6 **388**, 73-85 (2016).
- 7 2. T. Conroy *et al.*, FOLFIRINOX or gemcitabine as adjuvant therapy for  
8 pancreatic cancer. *New England Journal of Medicine* **379**, 2395-2406 (2018).
- 9 3. I. De Santiago *et al.*, Immunophenotypes of pancreatic ductal  
10 adenocarcinoma: Meta-analysis of transcriptional subtypes. *International*  
11 *journal of cancer*, (2019).
- 12 4. Y. Ino *et al.*, Immune cell infiltration as an indicator of the immune  
13 microenvironment of pancreatic cancer. *British journal of cancer* **108**, 914-  
14 923 (2013).
- 15 5. C. E. Clark *et al.*, Dynamics of the immune reaction to pancreatic cancer from  
16 inception to invasion. *Cancer research* **67**, 9518-9527 (2007).
- 17 6. I. De Santiago *et al.*, Immunophenotypes of pancreatic ductal  
18 adenocarcinoma: Meta-analysis of transcriptional subtypes. *International*  
19 *journal of cancer* **145**, 1125-1137 (2019).
- 20 7. E. S. Knudsen *et al.*, Stratification of pancreatic ductal adenocarcinoma:  
21 combinatorial genetic, stromal, and immunologic markers. *Clinical Cancer*  
22 *Research* **23**, 4429-4440 (2017).
- 23 8. L. J. Bayne *et al.*, Tumor-derived granulocyte-macrophage colony-stimulating  
24 factor regulates myeloid inflammation and T cell immunity in pancreatic  
25 cancer. *Cancer cell* **21**, 822-835 (2012).
- 26 9. S. Roth *et al.*, Evolution of the immune landscape during progression of  
27 pancreatic intraductal papillary mucinous neoplasms to invasive cancer.  
28 *EBioMedicine* **54**, (2020).
- 29 10. J. Brahmer *et al.*, Nivolumab versus docetaxel in advanced squamous-cell  
30 non-small-cell lung cancer. *New England Journal of Medicine* **373**, 123-135  
31 (2015).
- 32 11. C. Robert *et al.*, Pembrolizumab versus ipilimumab in advanced melanoma.  
33 *New England Journal of Medicine* **372**, 2521-2532 (2015).
- 34 12. M. Aglietta *et al.*, A phase I dose escalation trial of tremelimumab (CP-  
35 675,206) in combination with gemcitabine in chemotherapy-naive patients  
36 with metastatic pancreatic cancer. *Annals of oncology* **25**, 1750-1755 (2014).
- 37 13. G. L. Beatty *et al.*, A phase I study of an agonist CD40 monoclonal antibody  
38 (CP-870,893) in combination with gemcitabine in patients with advanced  
39 pancreatic ductal adenocarcinoma. *Clinical cancer research* **19**, 6286-6295  
40 (2013).
- 41 14. E. M. O'Reilly *et al.*, Durvalumab with or without tremelimumab for patients  
42 with metastatic pancreatic ductal adenocarcinoma: a phase 2 randomized  
43 clinical trial. *JAMA oncology* **5**, 1431-1438 (2019).
- 44 15. K. Young, D. J. Hughes, D. Cunningham, N. Starling, Immunotherapy and  
45 pancreatic cancer: unique challenges and potential opportunities. *Ther Adv*  
46 *Med Oncol* **10**, 1758835918816281-1758835918816281 (2018).



- 1 16. J. L. Carstens *et al.*, Spatial computation of intratumoral T cells correlates with  
2 survival of patients with pancreatic cancer. *Nature communications* **8**, 1-13  
3 (2017).
- 4 17. M. Wartenberg *et al.*, Accumulation of FOXP3+ T-cells in the tumor  
5 microenvironment is associated with an epithelial-mesenchymal-transition-  
6 type tumor budding phenotype and is an independent prognostic factor in  
7 surgically resected pancreatic ductal adenocarcinoma. *Oncotarget* **6**, 4190  
8 (2015).
- 9 18. A. Popovic, E. M. Jaffee, N. Zaidi, Emerging strategies for combination  
10 checkpoint modulators in cancer immunotherapy. *J Clin Invest* **128**, 3209-  
11 3218 (2018).
- 12 19. K. M. Mahoney, P. D. Rennert, G. J. Freeman, Combination cancer  
13 immunotherapy and new immunomodulatory targets. *Nature Reviews Drug*  
14 *Discovery* **14**, 561-584 (2015).
- 15 20. S. Pandol, M. Edderkaoui, I. Gukovsky, A. Lugea, A. Gukovskaya,  
16 Desmoplasia of Pancreatic Ductal Adenocarcinoma. *Clinical*  
17 *Gastroenterology and Hepatology* **7**, S44-S47 (2009).
- 18 21. Y. S. Khaled, B. J. Ammori, E. Elkord, Increased Levels of Granulocytic  
19 Myeloid-Derived Suppressor Cells in Peripheral Blood and Tumour Tissue of  
20 Pancreatic Cancer Patients. *Journal of Immunology Research* **2014**, 879897  
21 (2014).
- 22 22. J. Pillay, T. Tak, V. M. Kamp, L. Koenderman, Immune suppression by  
23 neutrophils and granulocytic myeloid-derived suppressor cells: similarities and  
24 differences. *Cell Mol Life Sci* **70**, 3813-3827 (2013).
- 25 23. S. Singhal *et al.*, Origin and Role of a Subset of Tumor-Associated  
26 Neutrophils with Antigen-Presenting Cell Features in Early-Stage Human  
27 Lung Cancer. *Cancer Cell* **30**, 120-135 (2016).
- 28 24. R. Z. Panni *et al.*, Tumor-induced STAT3 activation in monocytic myeloid-  
29 derived suppressor cells enhances stemness and mesenchymal properties in  
30 human pancreatic cancer. *Cancer Immunology, Immunotherapy* **63**, 513-528  
31 (2014).
- 32 25. B. E. Hsu *et al.*, Immature low-density neutrophils exhibit metabolic  
33 flexibility that facilitates breast cancer liver metastasis. *Cell reports* **27**, 3902-  
34 3915. e3906 (2019).
- 35 26. J. G. Burel *et al.*, Circulating T cell-monocyte complexes are markers of  
36 immune perturbations. *Elife* **8**, e46045 (2019).
- 37 27. L. Pangrazzi, B. Weinberger, T cells, aging and senescence. *Experimental*  
38 *Gerontology* **134**, 110887 (2020).
- 39 28. B. I. Pereira *et al.*, Sestrins induce natural killer function in senescent-like  
40 CD8+ T cells. *Nature Immunology* **21**, 684-694 (2020).
- 41 29. J. P. Chou, R. B. Effros, T cell replicative senescence in human aging. *Curr*  
42 *Pharm Des* **19**, 1680-1698 (2013).
- 43 30. X. Liu, D. F. Hoft, G. Peng, Senescent T cells within suppressive tumor  
44 microenvironments: emerging target for tumor immunotherapy. *The Journal*  
45 *of Clinical Investigation* **130**, 1073-1083 (2020).
- 46 31. E. Ghorani *et al.*, The T cell differentiation landscape is shaped by tumour  
47 mutations in lung cancer. *Nature Cancer* **1**, 546-561 (2020).
- 48 32. J. Fourcade *et al.*, CD226 opposes TIGIT to disrupt Tregs in melanoma. *JCI*  
49 *Insight* **3**, (2018).

- 1 33. C. A. Fuhrman *et al.*, Divergent Phenotypes of Human Regulatory T Cells  
2 Expressing the Receptors TIGIT and CD226. *The Journal of Immunology*,  
3 (2015).
- 4 34. N. Joller *et al.*, Treg cells expressing the coinhibitory molecule TIGIT  
5 selectively inhibit proinflammatory Th1 and Th17 cell responses. *Immunity*  
6 **40**, 569-581 (2014).
- 7 35. Q. Chen *et al.*, ICOS signal facilitates Foxp3 transcription to favor suppressive  
8 function of regulatory T cells. *Int J Med Sci* **15**, 666-673 (2018).
- 9 36. M. Vocanson *et al.*, Inducible costimulator (ICOS) is a marker for highly  
10 suppressive antigen-specific T cells sharing features of TH17/TH1 and  
11 regulatory T cells. *J Allergy Clin Immunol* **126**, 280-289, 289.e281-287  
12 (2010).
- 13 37. J. Peng *et al.*, Single-cell RNA-seq highlights intra-tumoral heterogeneity and  
14 malignant progression in pancreatic ductal adenocarcinoma. *Cell Res* **29**, 725-  
15 738 (2019).
- 16 38. O. Khan *et al.*, TOX transcriptionally and epigenetically programs CD8+ T  
17 cell exhaustion. *Nature* **571**, 211-218 (2019).
- 18 39. C. Zheng *et al.*, Landscape of Infiltrating T Cells in Liver Cancer Revealed by  
19 Single-Cell Sequencing. *Cell* **169**, 1342-1356.e1316 (2017).
- 20 40. N. Hiraoka, K. Onozato, T. Kosuge, S. Hirohashi, Prevalence of  
21 FOXP3<sup>+</sup> Regulatory T Cells Increases During the Progression of  
22 Pancreatic Ductal Adenocarcinoma and Its Premalignant Lesions. *Clinical*  
23 *Cancer Research* **12**, 5423-5434 (2006).
- 24 41. Y. Zhang *et al.*, Regulatory T cell depletion alters the tumor  
25 microenvironment and accelerates pancreatic carcinogenesis. *Cancer*  
26 *Discovery*, CD-19-0958 (2020).
- 27 42. W. J. Ho, E. M. Jaffee, L. Zheng, The tumour microenvironment in pancreatic  
28 cancer — clinical challenges and opportunities. *Nature Reviews Clinical*  
29 *Oncology*, (2020).
- 30 43. N. G. Steele *et al.*, Multimodal mapping of the tumor and peripheral blood  
31 immune landscape in human pancreatic cancer. *Nature Cancer*, 1-16 (2020).
- 32 44. L. E. Lucca *et al.*, TIGIT signaling restores suppressor function of Th1 Tregs.  
33 *JCI insight* **4**, e124427 (2019).
- 34 45. H.-s. Jin *et al.*, CD226<sup>hi</sup>CD8<sup>+</sup> T Cells Are a  
35 Prerequisite for Anti-TIGIT Immunotherapy. *Cancer Immunology Research*,  
36 (2020).
- 37 46. H. Sakamoto *et al.*, The Evolutionary Origins of Recurrent Pancreatic Cancer.  
38 *Cancer Discovery* **10**, 792-805 (2020).
- 39 47. D. Kasakovski, L. Xu, Y. Li, T cell senescence and CAR-T cell exhaustion in  
40 hematological malignancies. *J Hematol Oncol* **11**, 91-91 (2018).
- 41 48. H. Nakagami, Cellular senescence and senescence-associated T cells as a  
42 potential therapeutic target. *Geriatr Gerontol Int* **20**, 97-100 (2020).
- 43 49. A. Lanna, S. M. Henson, D. Escors, A. N. Akbar, The kinase p38 activated by  
44 the metabolic regulator AMPK and scaffold TAB1 drives the senescence of  
45 human T cells. *Nature Immunology* **15**, 965-972 (2014).
- 46 50. Y. Zhao, Q. Shao, G. Peng, Exhaustion and senescence: two crucial  
47 dysfunctional states of T cells in the tumor microenvironment. *Cellular &*  
48 *Molecular Immunology* **17**, 27-35 (2020).

- 1 51. X. Liu *et al.*, Regulatory T cells trigger effector T cell DNA damage and  
2 senescence caused by metabolic competition. *Nature Communications* **9**, 249  
3 (2018).  
4 52. M. Huber *et al.*, The Immune Microenvironment in Pancreatic Cancer.  
5 *International Journal of Molecular Sciences* **21**, 7307 (2020).  
6 53. A. Butler, P. Hoffman, P. Smibert, E. Papalexi, R. Satija, Integrating single-  
7 cell transcriptomic data across different conditions, technologies, and species.  
8 *Nature Biotechnology* **36**, 411-420 (2018).  
9 54. I. Korsunsky *et al.*, Fast, sensitive and accurate integration of single-cell data  
10 with Harmony. *Nature Methods* **16**, 1289-1296 (2019).  
11 55. C. Yang *et al.*, Heterogeneity of human bone marrow and blood natural killer  
12 cells defined by single-cell transcriptome. *Nature Communications* **10**, 3931  
13 (2019).  
14

### 15 **Acknowledgments:**

16 We thank all members of the Dustin lab for fruitful discussions. We thank  
17 Vincenzo Cerundolo and Giorgio Napolitano for discussions on CyTOF panel design.  
18 We thank A. Lanna for helpful discussion on senescent T-cells. We thank A. van der  
19 Merwe, A. Artzy-Schinrman, A. Morch and P. Cespedes for comments on the  
20 manuscript. We thank L. Campo and the translation histopathology lab for help with  
21 multiplex IHC imaging. We thank S. Jones and Oxford Research Biobank for help with  
22 tissue cutting and collection. We acknowledge the contribution to this study made by  
23 the Oxford Centre for Histopathology Research and the Oxford Radcliffe Biobank,  
24 which are supported by the NIHR Oxford Biomedical Research Centre.

### 25 **Funding**

26 A national institute for health research (NIHR) academic clinical lectureship  
27 supported SS for the majority of this work. Oxford human immunology discovery  
28 initiative, cancer research UK and LAP (liver and pancreas fund) supported SS. SS is  
29 now supported by a career development fellowship from BMS. An UCB-Oxford Post-  
30 doctoral Fellowship supported EAS. MRM is supported by the NIHR Oxford  
31 Biomedical Research Centre. The views expressed are those of the authors and not  
32 necessarily those of the NIHR or the Department of Health and Social Care. Wellcome

1 Trust Principal Research Fellowship 100262Z/12/Z and a grant from KTRR supported  
2 M.L.D.

### 3 **Author's Contributions**

4 *Conceptualisation:* SS, EAS, MRM, MLD. *Investigation:* SS, EAS. *Methodology:* SS,  
5 EAS, JA, AE, EHAB, RBR. *Visualisation:* EAS, EHAB. *Formal analysis:* EAS,  
6 EHAB, RBR, DJA, LRH. *Data curation:* SS, EAS, DJA, EHAB, AE. *Project*  
7 *administration:* SS, EAS. *Resources:* NM, SR, AR, EK, MS. *Funding acquisition:* SS,  
8 EAS, MRM, MLD. *Writing - original draft:* EAS, SS. *Writing - review & editing:*  
9 everyone. *Supervision:* MRM, MLD.

### 10 **Competing interests**

11 SS has salary and expenses from BMS in the form of a career development  
12 fellowship. RJMB-R is a co-founder and consultant for Alchemab Therapeutics Ltd and  
13 a consultant for Imperial College London and VHSquared. MM reports personal fees  
14 from Amgen, grants and personal fees from Roche, grants from Astrazeneca, grants and  
15 personal fees from GSK, personal fees and other from Novartis, other from Millenium,  
16 personal fees, non-financial support and other from Immunocore, personal fees and  
17 other from BMS, personal fees and other from Eisai, other from Pfizer, personal fees,  
18 non-financial support and other from Merck/MSD, personal fees and other from  
19 Rigontec (acquired by MSD), other from Regeneron, personal fees from BiolineRx,  
20 personal fees and other from Array Biopharma (now Pfizer), non-financial support and  
21 other from Replimune, personal fees from Kineta, personal fees from Silicon  
22 Therapeutics, outside the submitted work. All other authors have no relevant conflicts  
23 of interest to declare.

### 24 **Data Availability**

25 Data available upon reasonable request from authors.

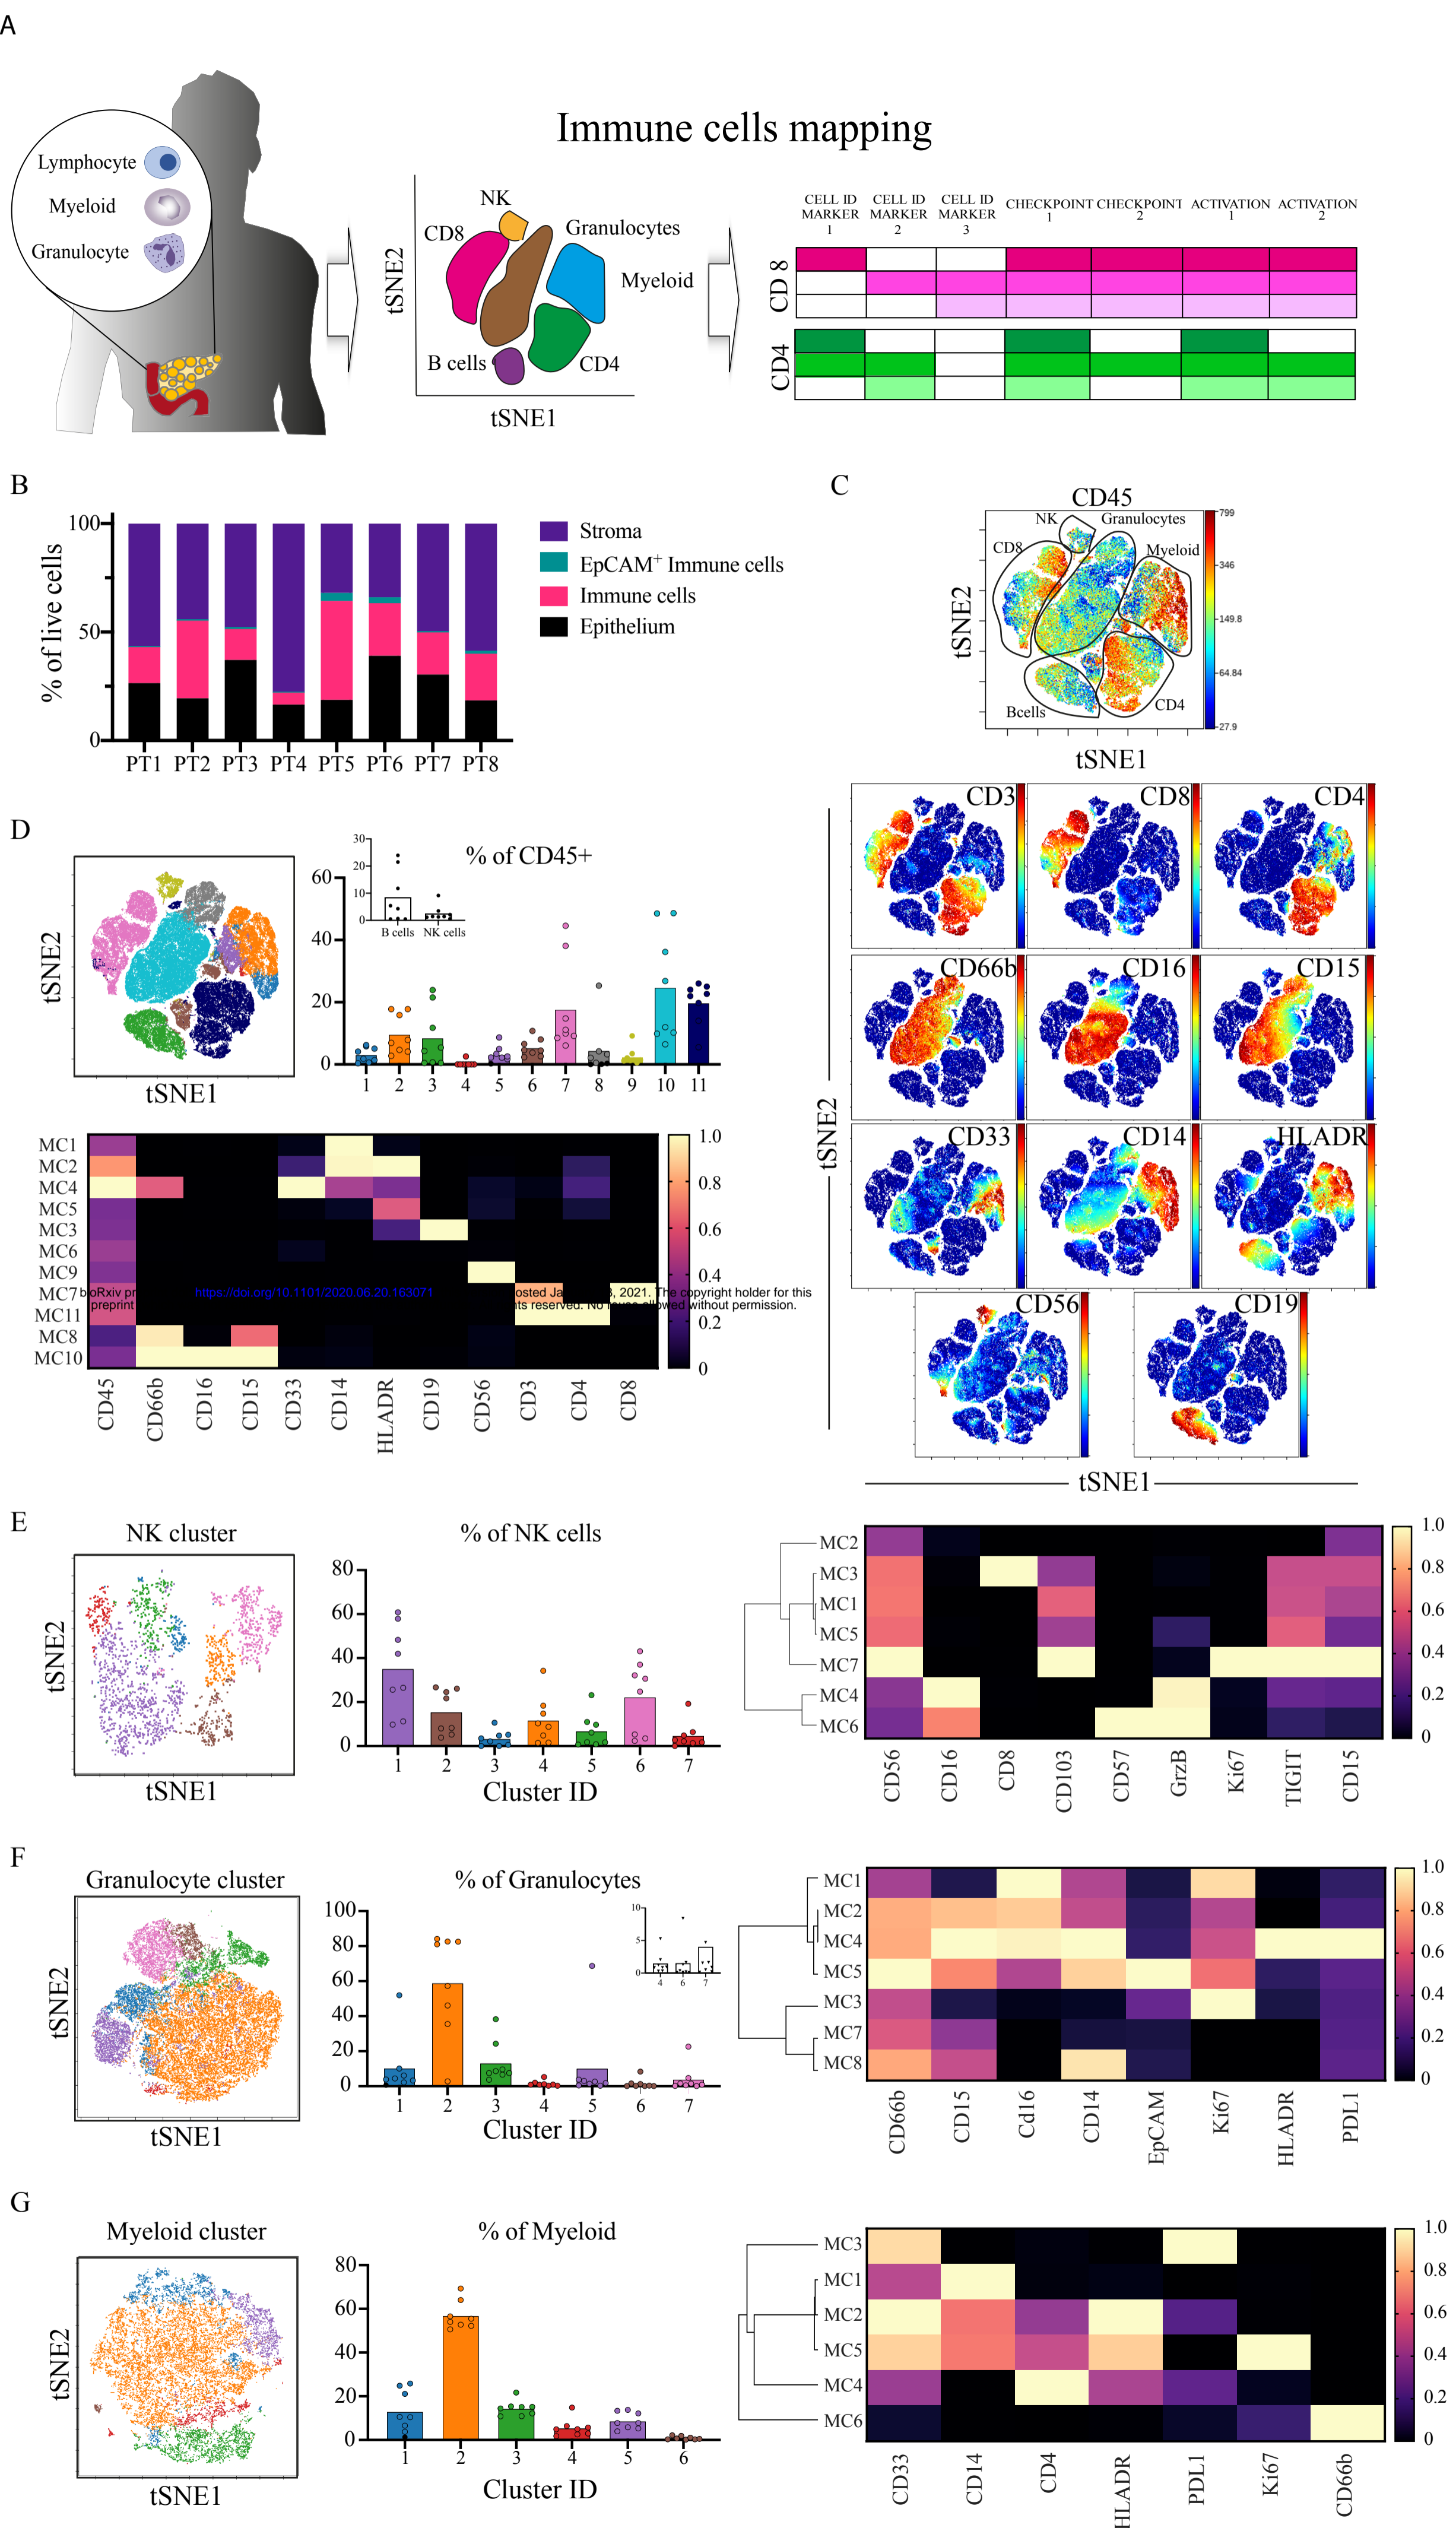

Figure 1, Sivakumar and Abu-Shah et al

1 **Figure 1: Immune infiltration into PDAC is heterogenous but with a marked T-**  
2 **cell population.** (A) Schematics of the experimental procedure; primary resectable  
3 pancreatic tumours are made into single-cell suspensions and taken for phenotyping  
4 using mass cytometry (CyTOF). CyTOF data was clustered using cytoBank FlowSOM  
5 to identify common populations across patients. Using a set of lineage markers,  
6 checkpoints and activation markers cellular states and functionality are defined with a  
7 focus on T-cell populations. (B) 200,000 cells pooled from 8 patients were gated in  
8 silico and cellular granularity was assessed; Immune cells (CD45<sup>+</sup>), epithelial cells  
9 (EpCAM<sup>+</sup>), Stroma (CD45<sup>-</sup>EpCAM<sup>-</sup>) and EpCAM<sup>+</sup> Immune cells (CD45<sup>+</sup>EpCAM<sup>+</sup>).  
10 (C) 100,000 CD45<sup>+</sup> cells pooled from 8 patients and viSNE analysis using main cell  
11 lineage markers was performed to identify the main immune cell populations. viSNE  
12 plot is shown with manual annotation of cell identities (top), expression profile of the  
13 CyTOF markers used for clustering is shown (bottom). (D) viSNE plot of the main  
14 immune populations coloured and labelled by FlowSOM. Bar plots of metacluster  
15 frequencies in each patient. Inset shows the B-cell and NK clusters (CV %111.3 and  
16 108.6% respectively). Heatmap of FlowSOM metaclusters of CD45<sup>+</sup> cells; rows  
17 represent metaclusters from combined single cells across patients. (E) NK cells were  
18 clustered with FlowSOM and 7 different metaclusters identified. Metacluster's relative  
19 frequency is presented in the bar plot. Inset shows the lower frequency metaclusters.  
20 Expression profile for each metacluster is shown in the heatmap (right). The major  
21 metacluster being a CD8<sup>+</sup> NK population. (F) Granulocyte were clustered with  
22 FlowSOM and 7 different metaclusters identified. Metacluster's relative frequency is  
23 presented in the bar plot. Inset shows the lower frequency metaclusters. Expression  
24 profile for each metacluster is shown in the heatmap (right). The major metacluster  
25 expressing an intermediate level of CD16 and CD15. (G) Myeloid cells were clustered

1 with FlowSOM and 6 different metaclusters identified. Metacluster's relative frequency  
2 is presented in the bar plot. Inset shows the lower frequency metaclusters. Expression  
3 profile for each metacluster is shown in the heatmap (right). The major metacluster  
4 expressing an intermediate level of CD14 and CD33 but high for MHCII (HLA-DR),  
5 and another important metacluster is the one lacking HLA-DR expression (MSDC). All  
6 bar plots are median and the individual dots are individual patients. Heatmaps are  
7 normalised for each marker with lowest expression marked in dark blue as zero, and  
8 highest in yellow as 1. MC= metacluster.

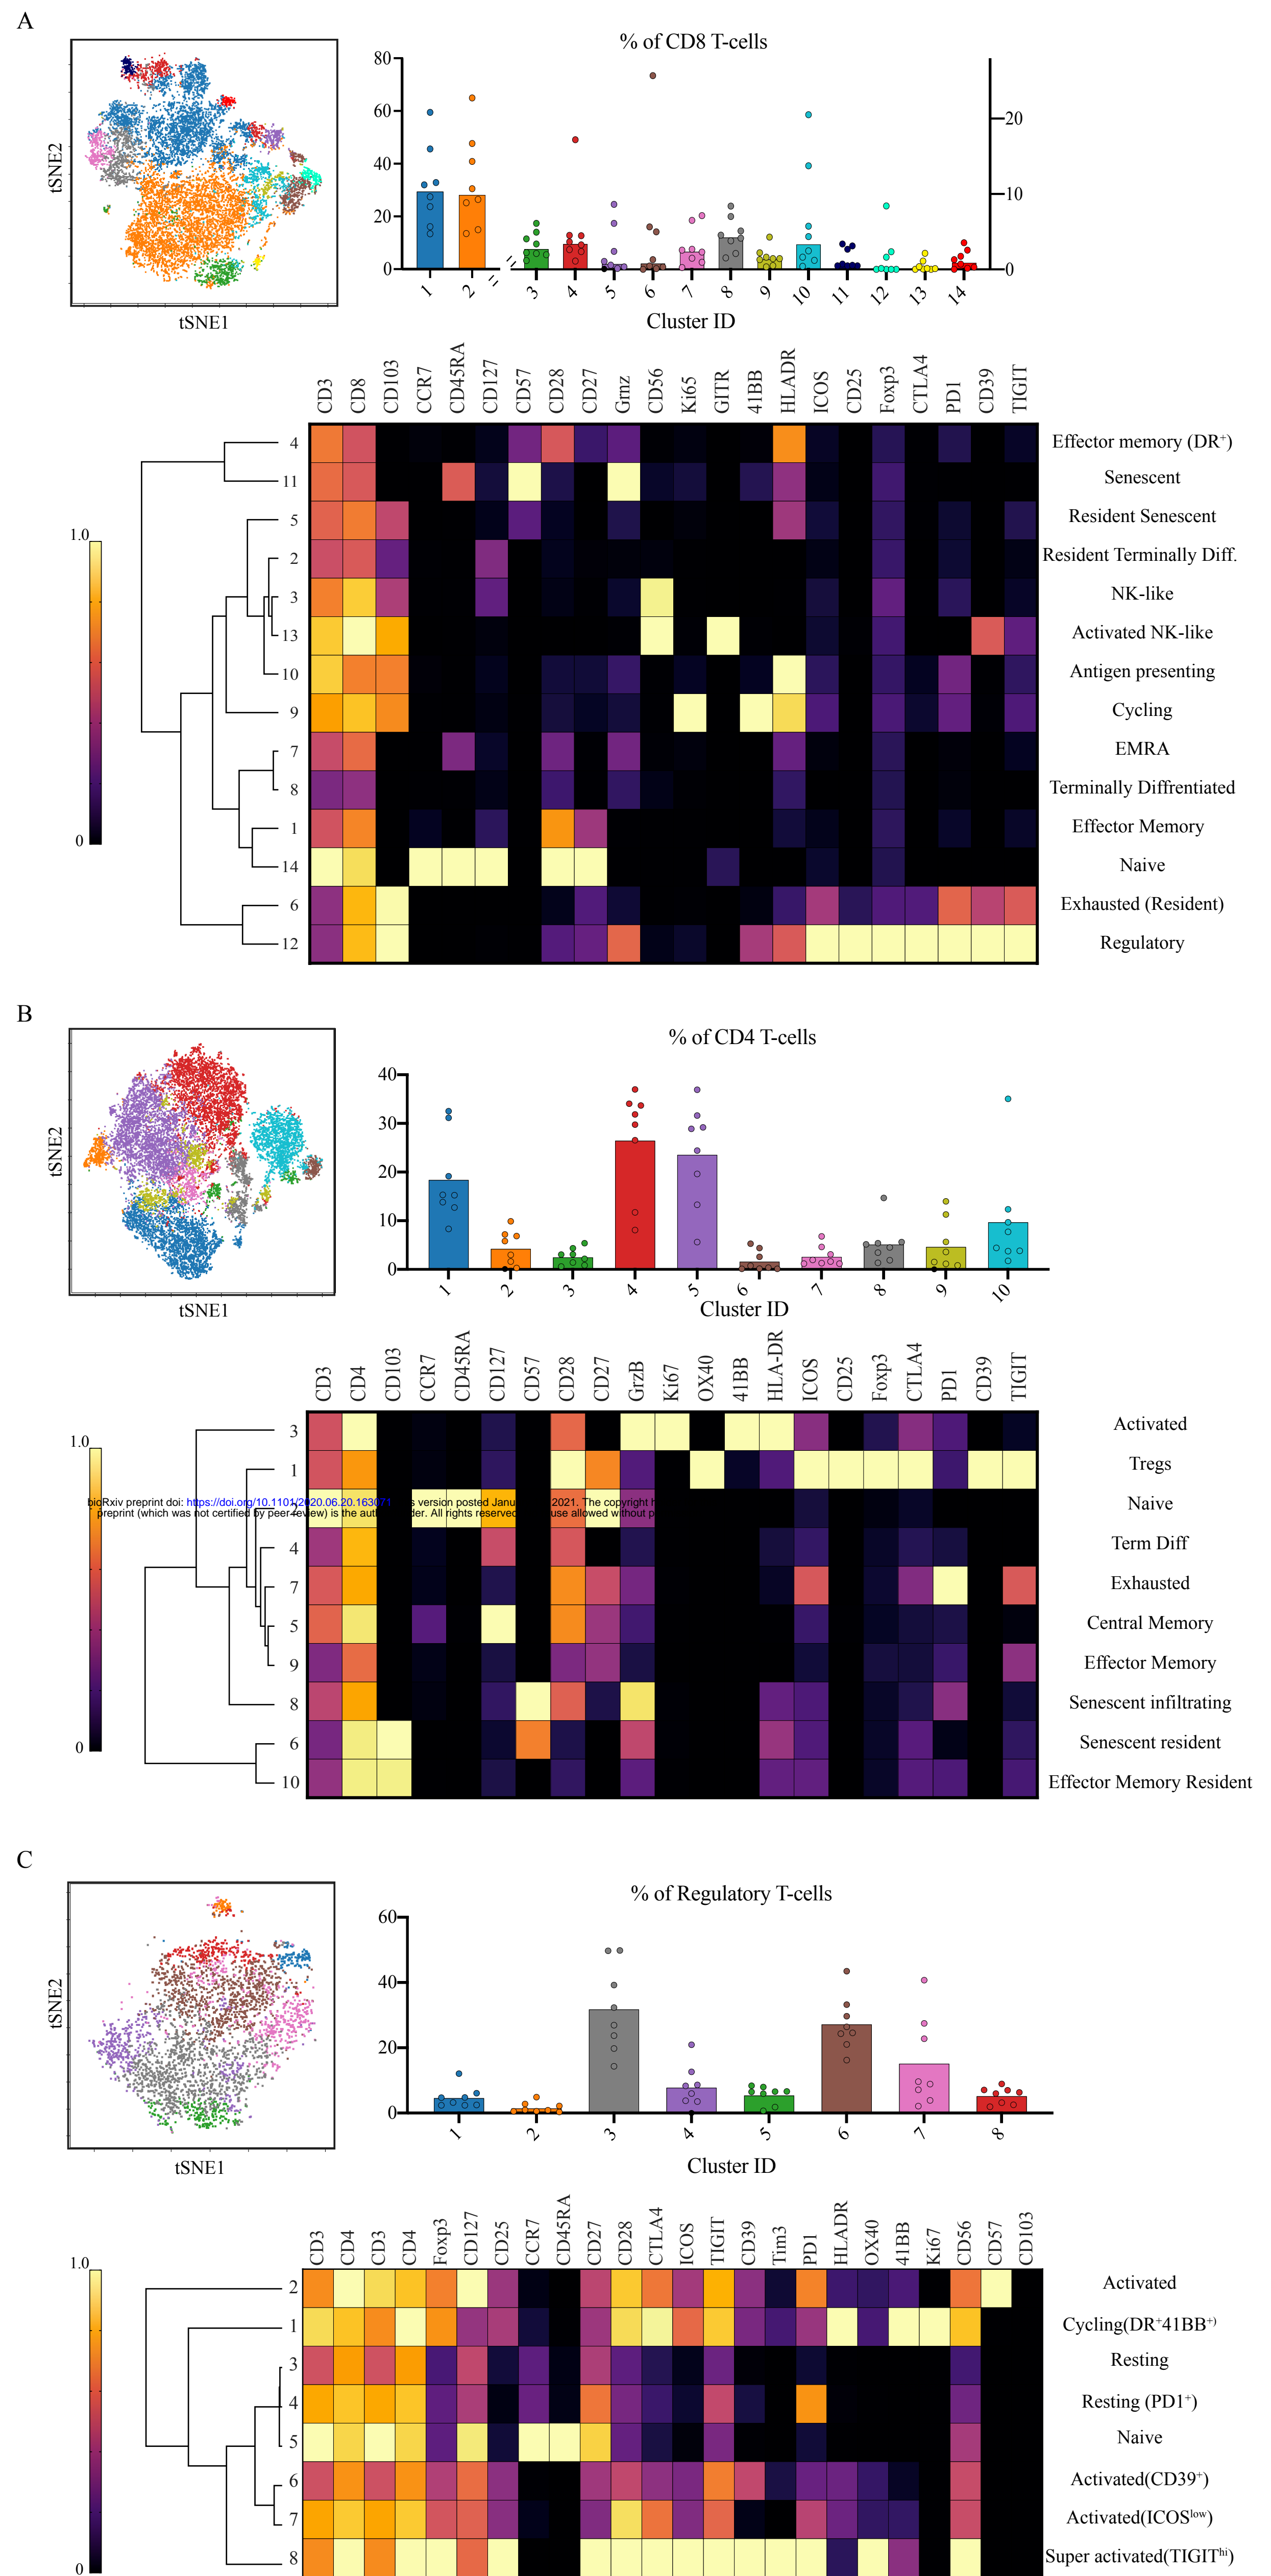

Figure 2, Sivakumar and Abu-Shah et al



1 **Figure 2: CD8<sup>+</sup> T-cell senescence and activated Tregs dominate the landscape of**  
2 **the tumour.** (A) ~14,750 CD8<sup>+</sup> T-cells were pooled and 14 metaclusters identified with  
3 FlowSOM and visualised on viSNE plot. Metaclusters' relative abundance is shown in  
4 the bar plot MC1,2 are plotted on the left y-axis, MC3-14 are plotted on the right y-  
5 axis). The heatmaps show the expression profile of immune checkpoints in the different  
6 metaclusters and identified unique populations based on the combinatorial expression.  
7 Note that the major CD8<sup>+</sup> populations are effector memory cells and the presence of 4  
8 metaclusters corresponding to senescent cells. There is also a proportion of exhausted  
9 cells as well as metaclusters of activated cells. (B) ~17,870 CD4<sup>+</sup> T-cells were pooled  
10 and 10 metaclusters identified with FlowSOM and visualised on viSNE plot.  
11 Metaclusters' relative abundance is shown in the bar plot. The heatmaps show the  
12 expression profile of immune checkpoints in the different metaclusters and identified  
13 unique populations based on the combinatorial expression. The major populations are  
14 central memory cells, and there were 5 metaclusters identified as regulatory T-cell  
15 (analysed in depth in (C)). (C) ~3,900 CD4<sup>+</sup> regulatory T-cells were pooled and 8  
16 metaclusters identified with FlowSOM and visualised on a viSNE plot. Metaclusters'  
17 relative abundance is shown in the bar plot. The heatmaps show the expression profile  
18 of immune checkpoints in the different metaclusters and identified unique populations  
19 based on the combinatorial expression. More than 50% of the metaclusters show an  
20 activated phenotype albeit at different magnitudes. All bar plots are median and the  
21 individual dots are individual patients. Heatmaps are normalised for each marker with  
22 lowest expression marked in dark blue as zero, and highest in yellow as 1. Hierarchical  
23 clustering of heatmaps was done in Morpheus.

A

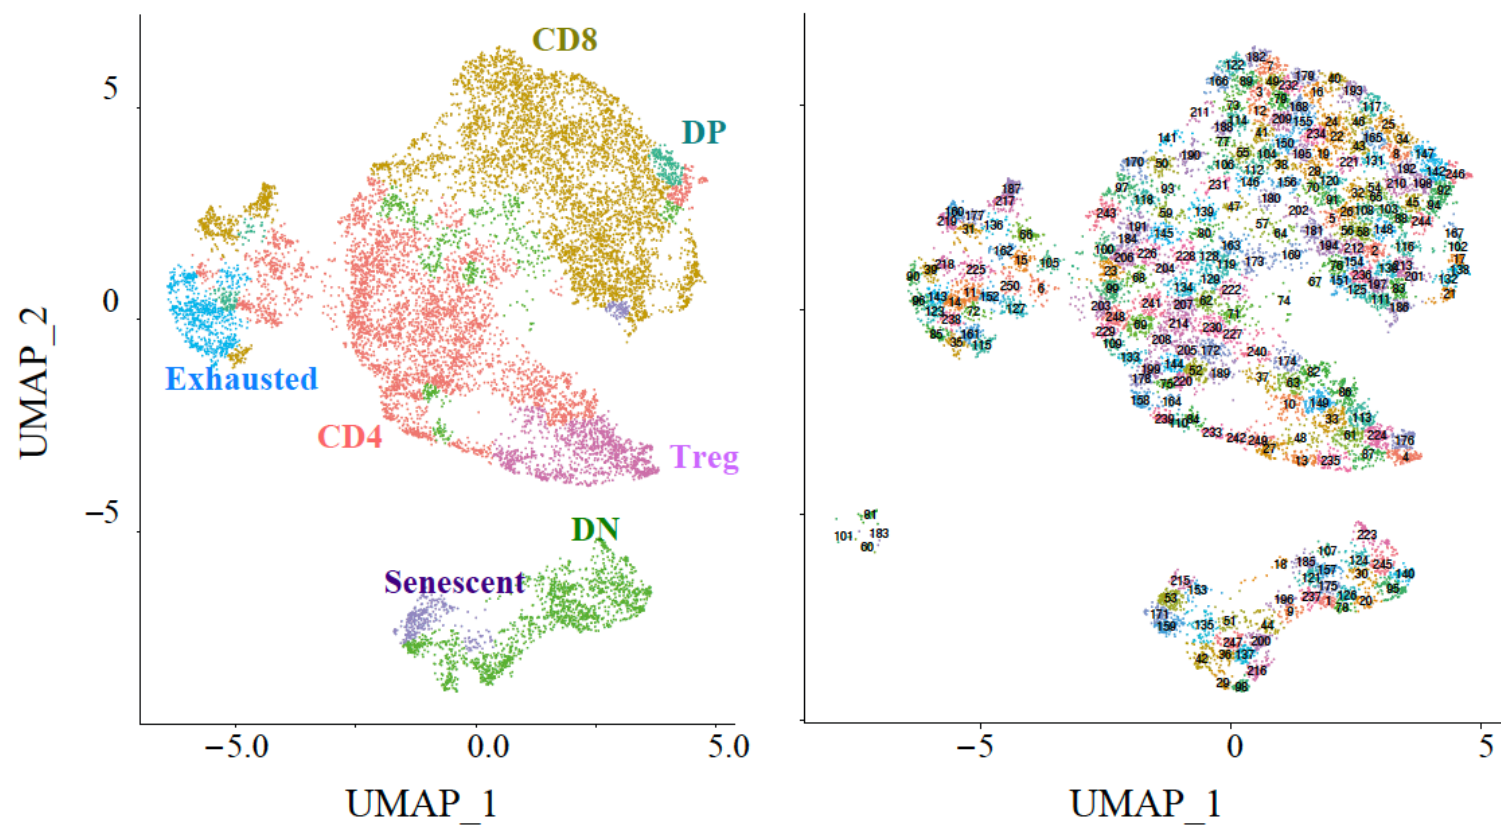

B

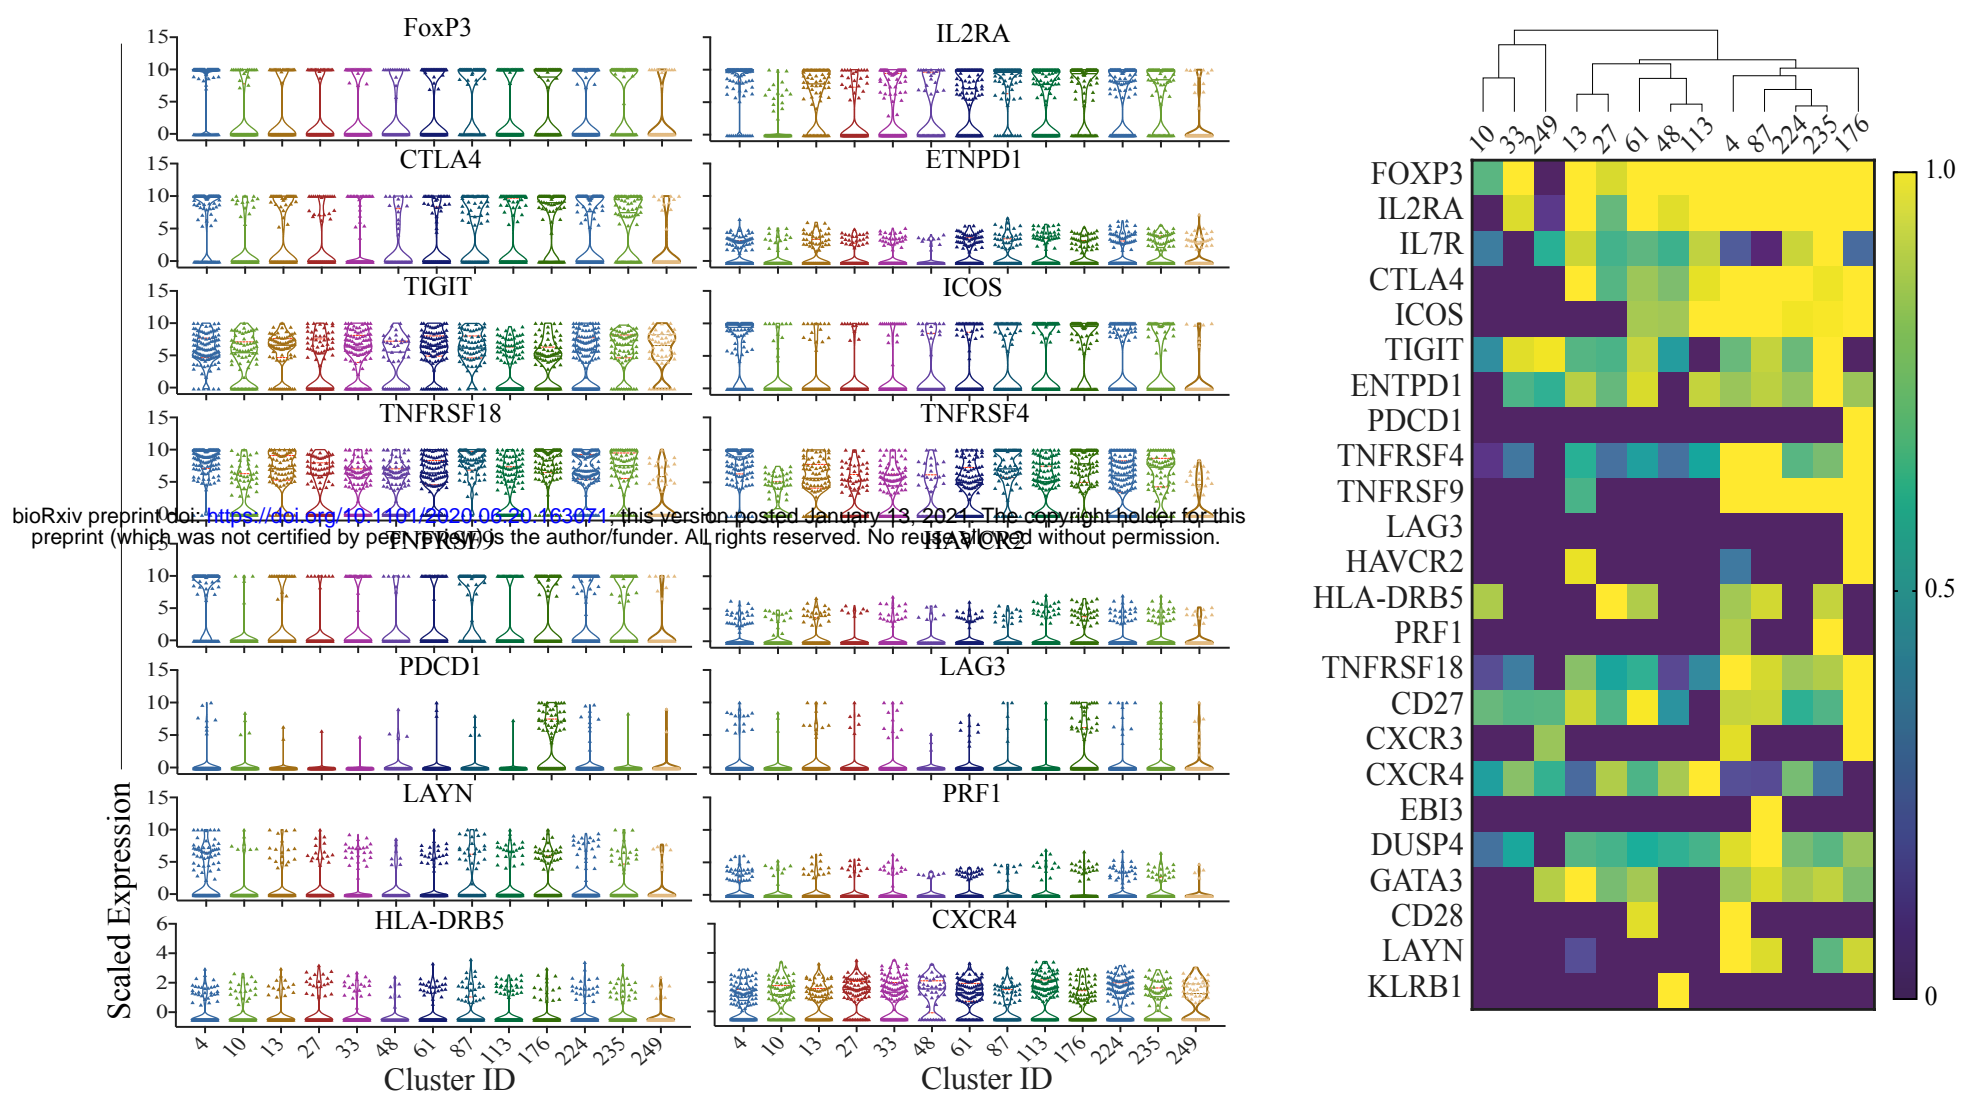

C

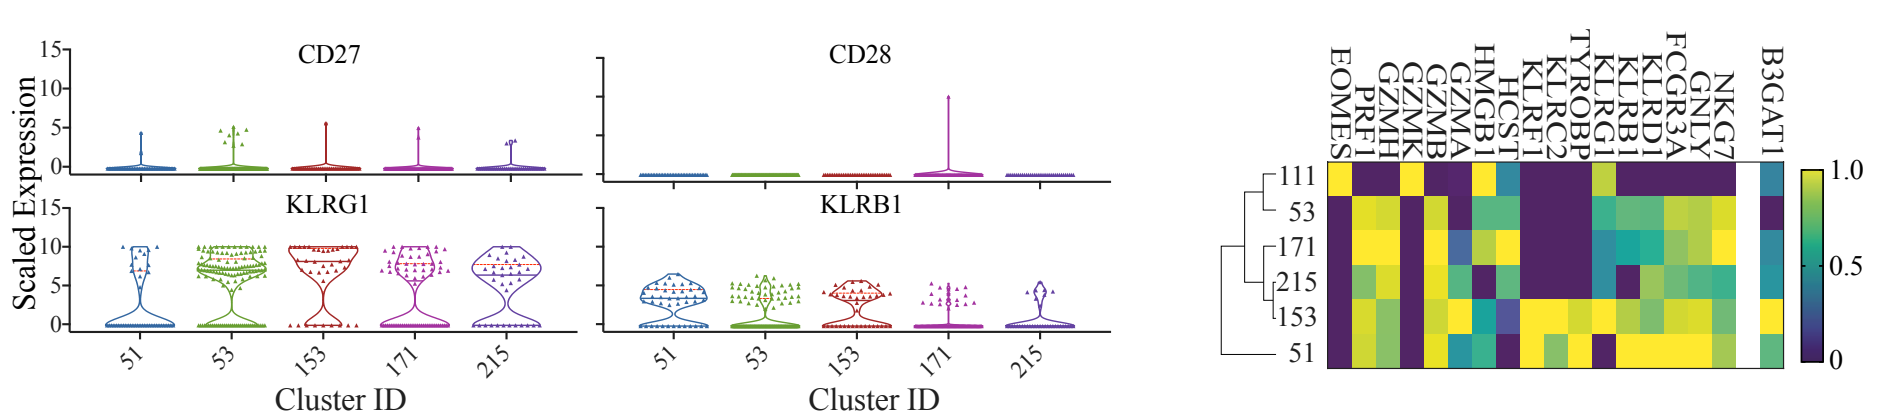

D

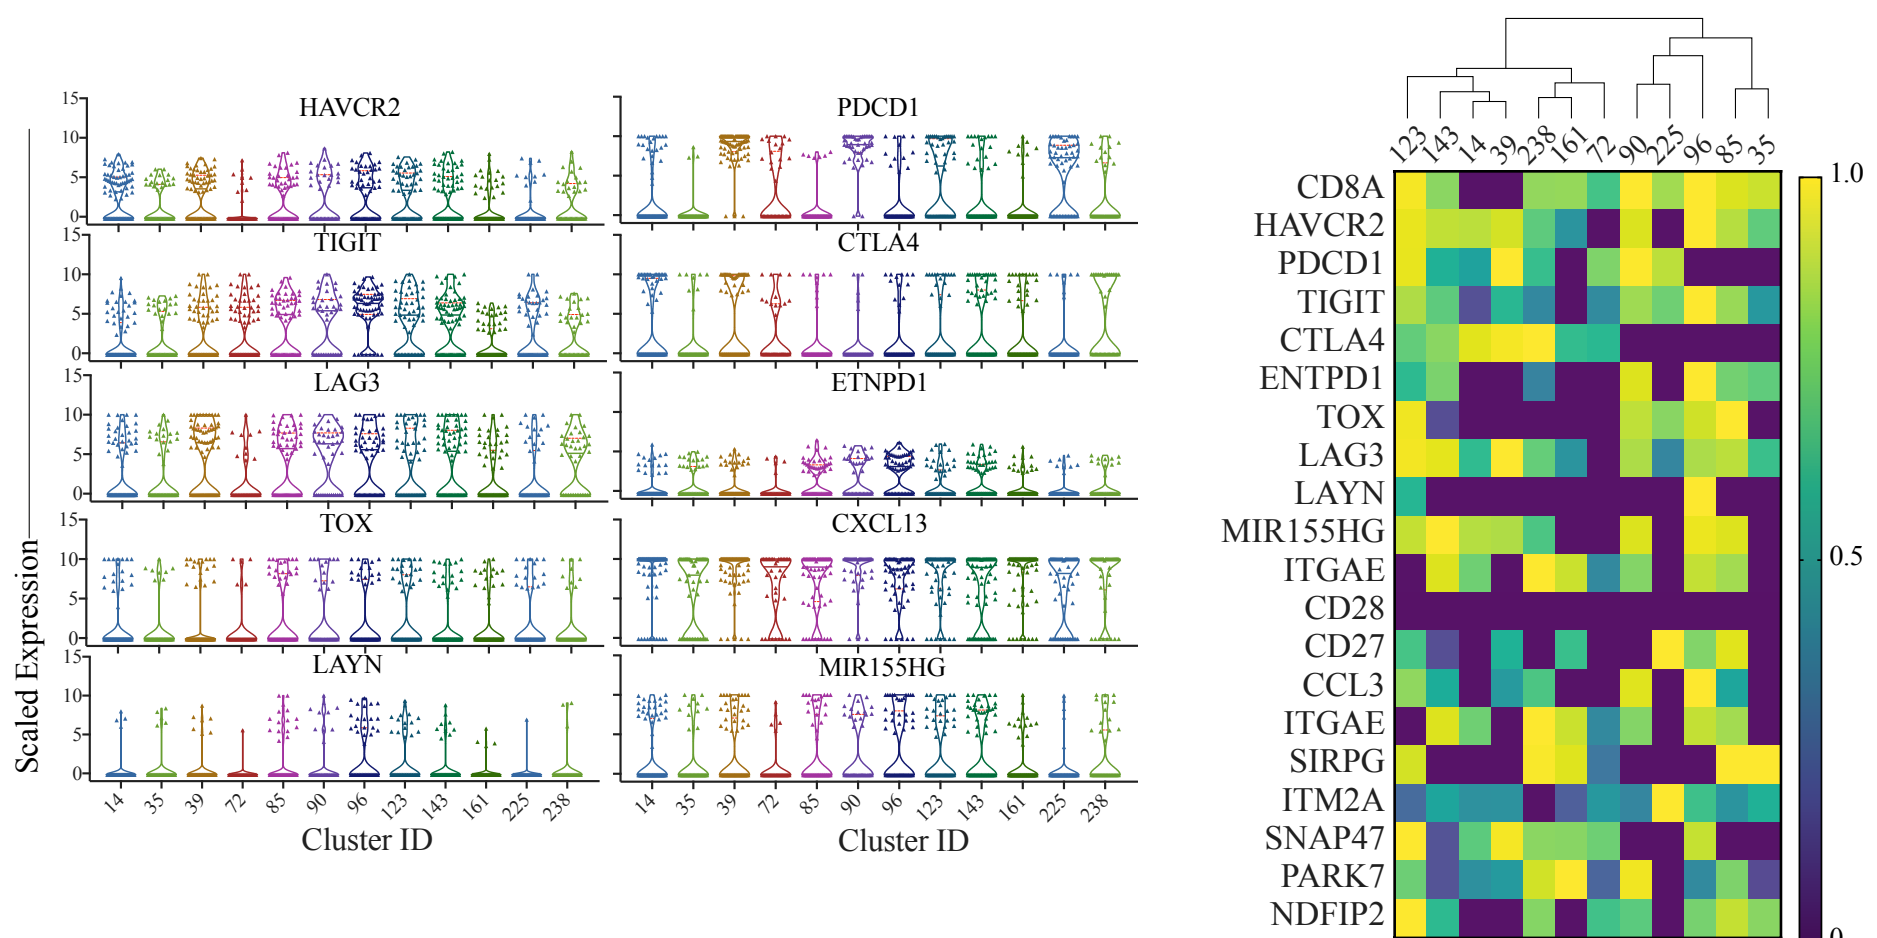

Figure 3, Sivakumar and Abu-Shah et al

1 **Figure 3: Single Cell RNA sequencing reveals senescence and regulatory signature**  
2 **of T-cells.** (A) Left, ~13,600 T cells in tumour are projected on UMAP and clusters  
3 annotated by the major compartments including regulatory T-cell (pink), senescent T-  
4 cells (purple) and exhausted T-cells (cyan). Right, UMAP of the cluster identities in  
5 each of the major subsets. (B) Left, Violin plots depicting the 75<sup>th</sup> percentile scaled  
6 expression of the marker genes in the Treg clusters. Right, heatmaps showing the top  
7 differentially expressed genes in the Treg clusters. Expression has been normalised per  
8 gene. (C) Left, Violin plots of the 75<sup>th</sup> percentile expression of the key gene signature  
9 for the senescent population. Right, Heatmaps showing NK and senescence genes  
10 uniquely expressed in the senescent population. Heatmap scale for *B3GAT1* is  
11 presented as mean values per cluster rather than the 75<sup>th</sup> percentile due to low capture  
12 of this gene. (D) Left, Violin plots of the 75<sup>th</sup> percentile expression of the key gene  
13 signatures for the exhausted T-cell population. Right, the corresponding heatmaps of  
14 the key gene signatures. Full expression profiles per cluster are provided in  
15 supplemental data file 2.

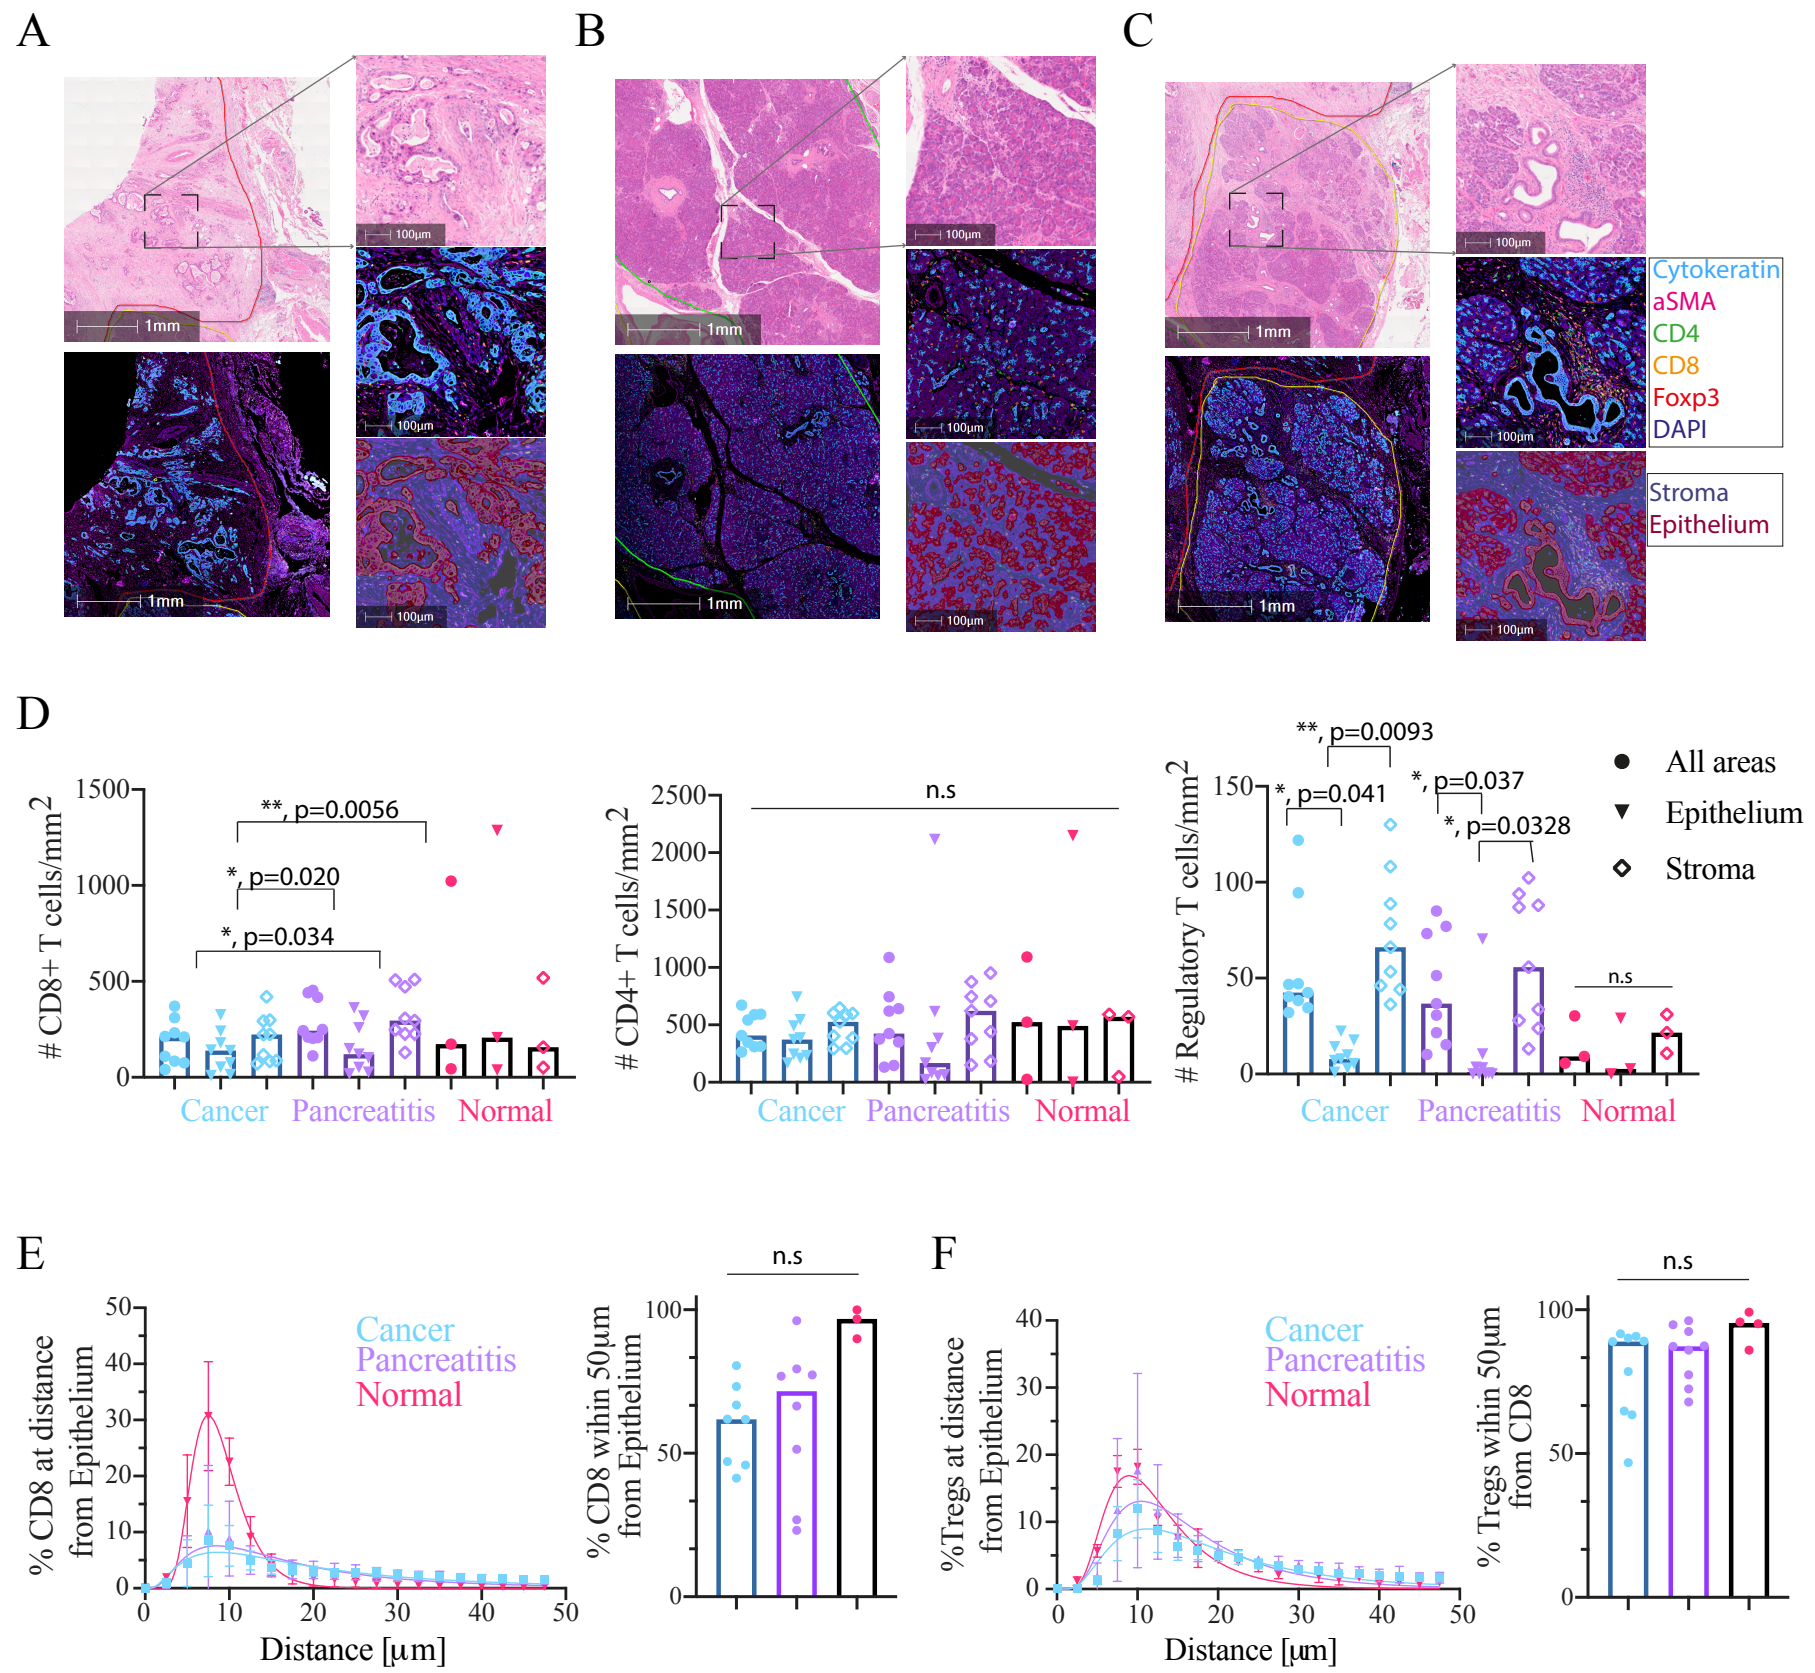

Figure 4, Sivakumar and Abu-Shah et al

1 **Figure 4: Multiplex imaging of T-cell distribution within PDAC tumours identifies**  
2 **a stroma restricted Treg compartment.** (A) 2x magnification (left) of a cancer region  
3 showing H&E (top) and immunofluorescence (bottom). 10x magnification (right) of a  
4 region from (left) showing H&E staining (top), the fluorescence signal (middle) and  
5 the region classification into epithelium and stroma (bottom). (B) As in (A) for a  
6 pancreatitis region. (C) As in (A) for a normal pancreas. (D) Infiltration of CD8<sup>+</sup> T-  
7 cells (left), CD4<sup>+</sup> T-cells (middle) and Tregs (right) into the tissue (Cancer, Pancreatitis  
8 and Normal), as well as sub-tissue architectural distribution between the epithelium-  
9 rich and stroma-rich areas. Mixed-effect ANOVA with Tukey's correction. (E)  
10 Proximity analysis of CD8<sup>+</sup> T-cells distance distribution within 50  $\mu\text{m}$  of epithelial cells  
11 fitted using a lognormal distribution with geometric means and  $R^2$  as follows: Cancer:  
12 17.21  $\mu\text{m}$ , 0.80; Pancreatitis 14.55  $\mu\text{m}$ , 0.79; Pancreas: 8.46  $\mu\text{m}$ , 0.99. (F) Proximity  
13 analysis of Treg distance distribution within 50  $\mu\text{m}$  of CD8<sup>+</sup> T-cells, fitted using a  
14 lognormal distribution with geometric means and  $R^2$  as follows: Cancer: 16.75  $\mu\text{m}$ ,  
15 0.84; Pancreatitis 14.28  $\mu\text{m}$ , 0.82; Pancreas: 11.24  $\mu\text{m}$ , 0.92.
